# Supplementary material for: Reef-scale trends in Florida Acropora spp. abundance and the effects of population enhancement
Source: PeerJ journal article supplement (doi:10.7717/peerj.2523), 2016-09-29
Supplement: Suppl_Fig1New.pdf [file Suppl_Fig1New.pdf]

Supplemental Figure 1: Images showing the outcomes (tracks and waypoints) for each census at each site. Yellow symbols represent *A.palmata* colonies, purple symbols represent *A.cervicornis* colonies, and red symbols show the outline of *A.palmata* 'thickets' (see text for explanation) with different shaped symbols used for different years. Sites are arranged in alphabetical order. Coordinates are given in Suppl. Table 2. Base imagery of the reef from GoogleEarth.

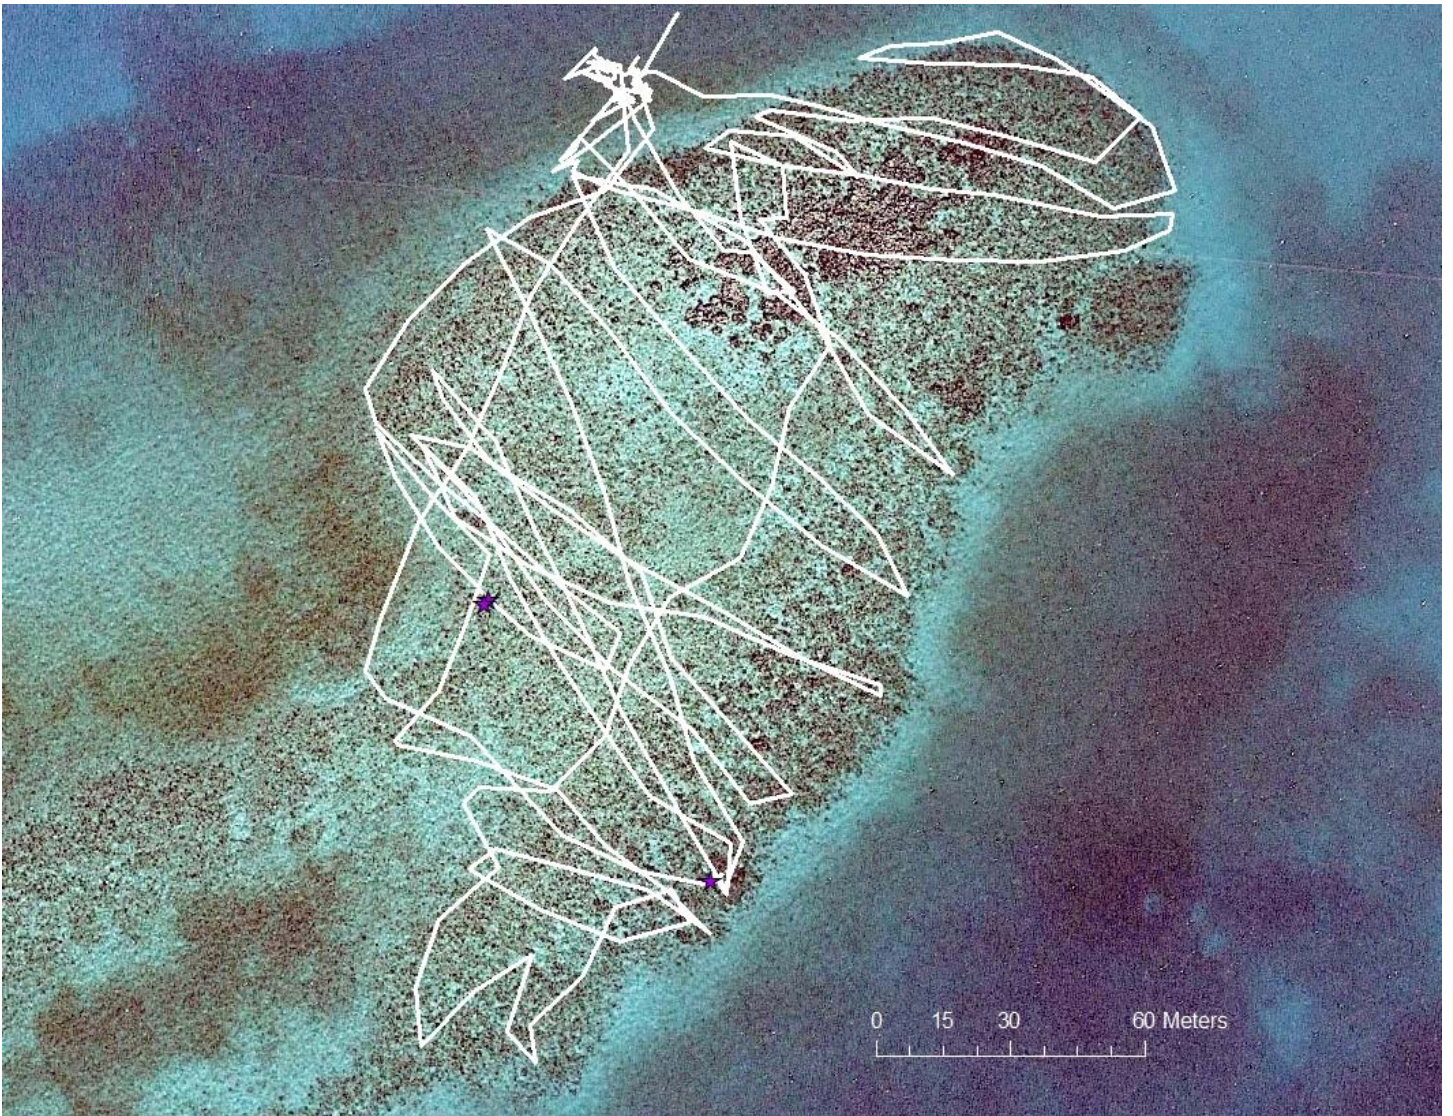

Admiral Reef 2005

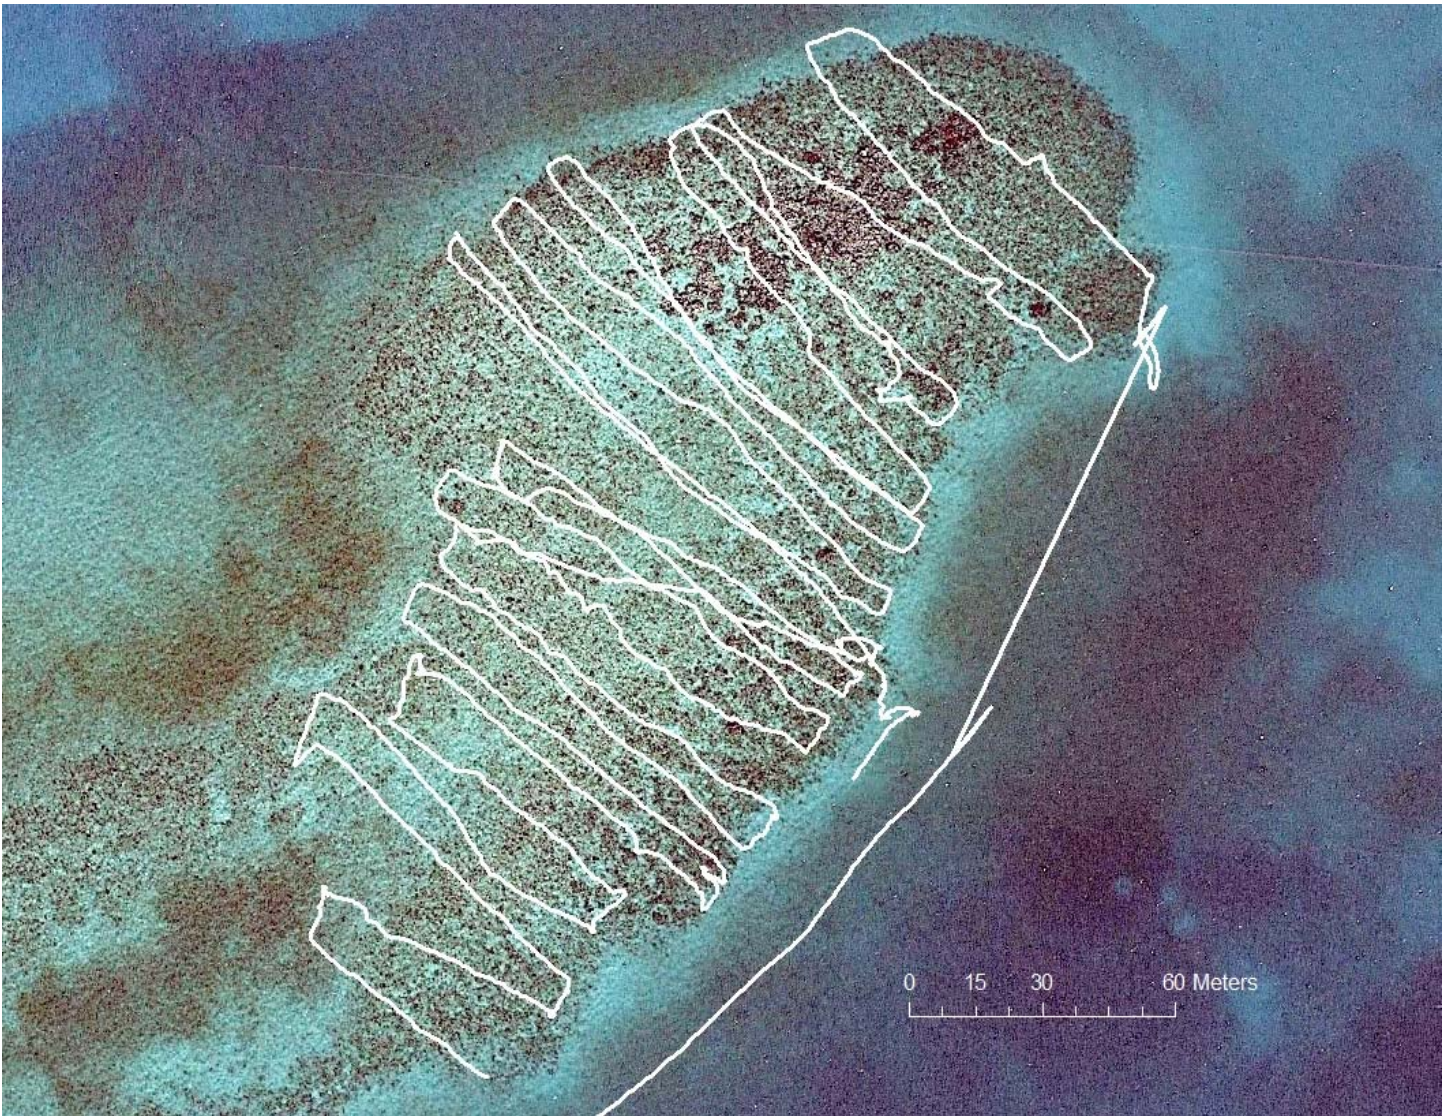

Admiral Reef 2015

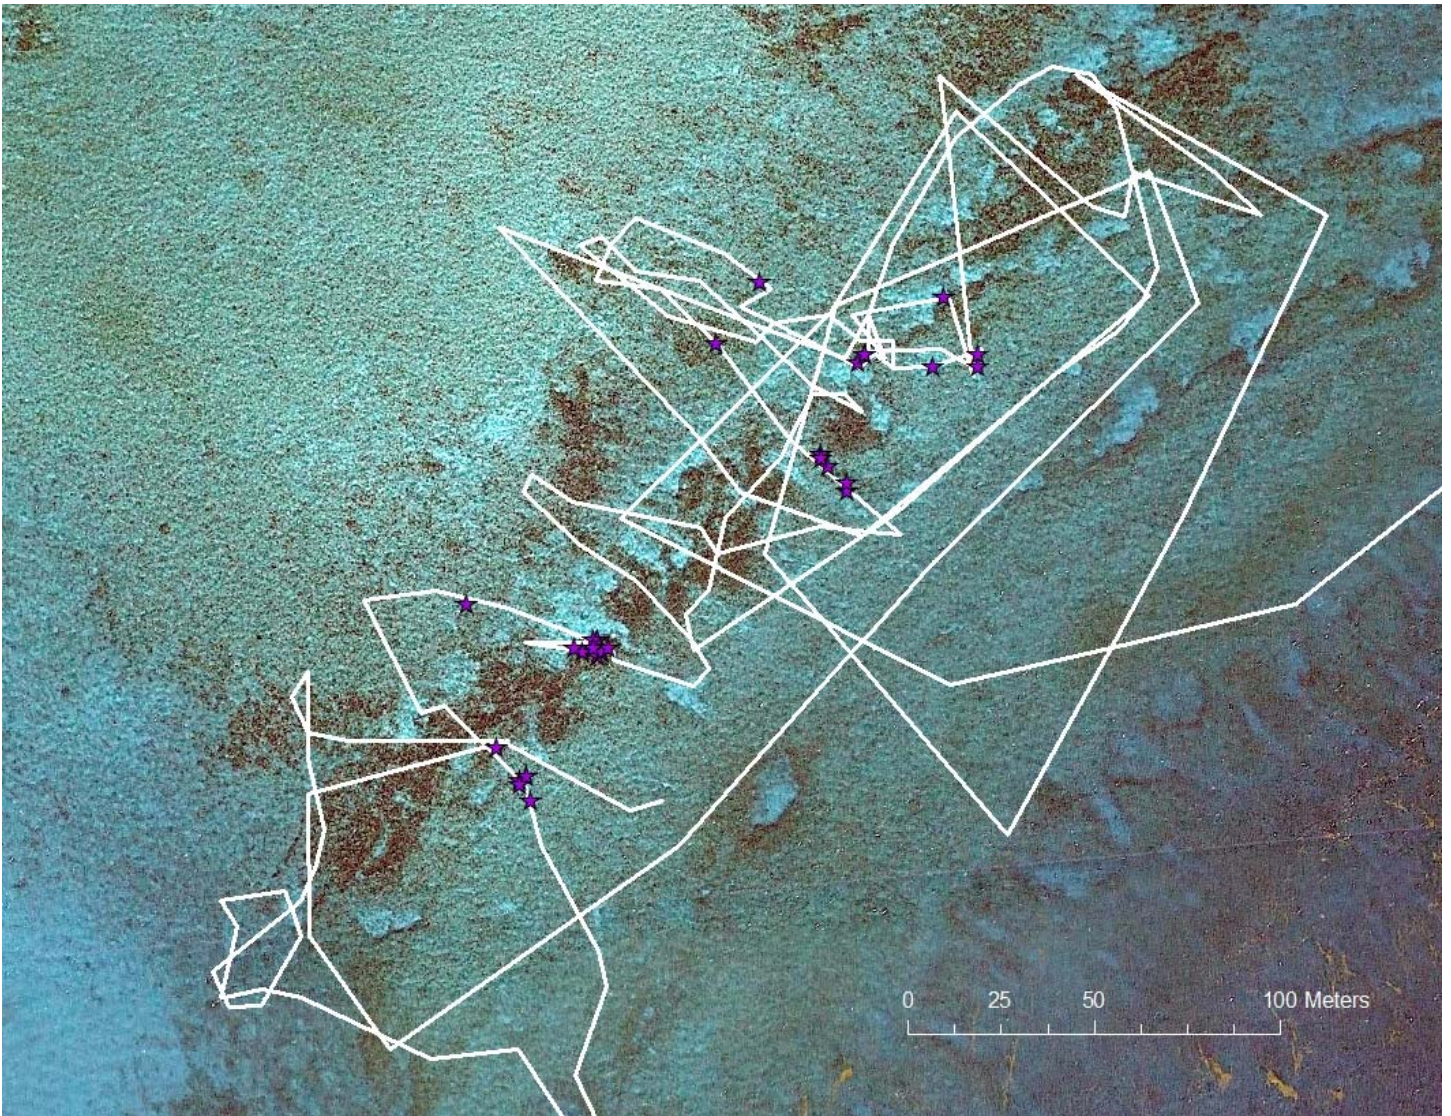

Belgium Reef 2005

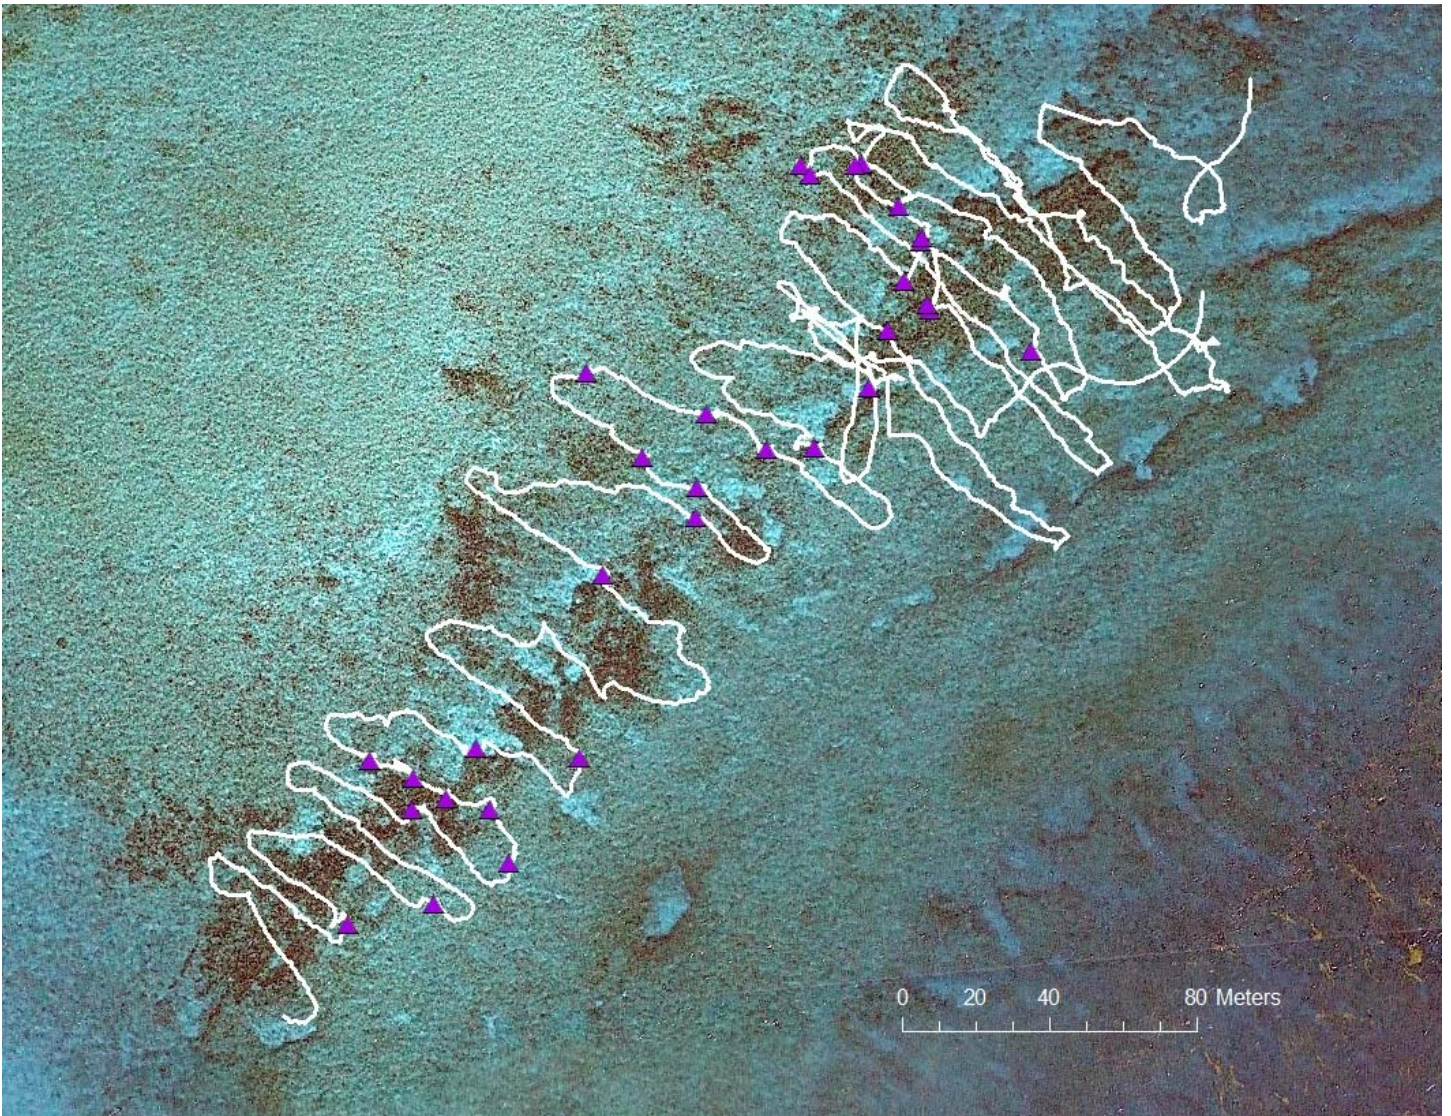

Belgium Reef 2015

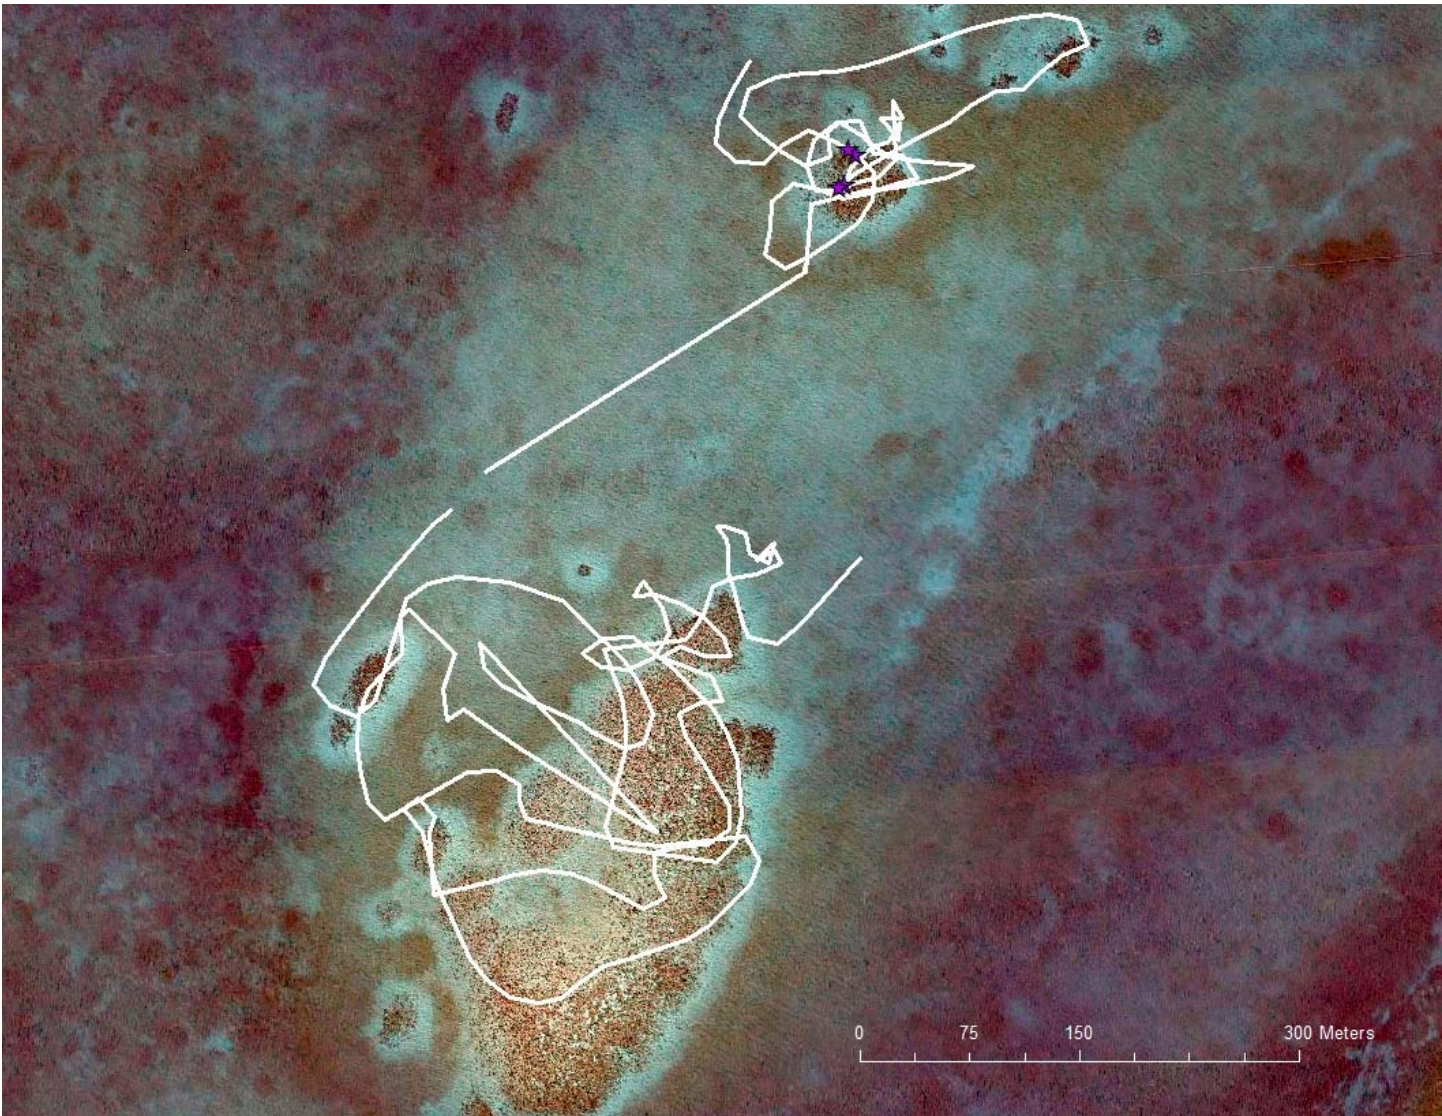

Cannon Patch 2007

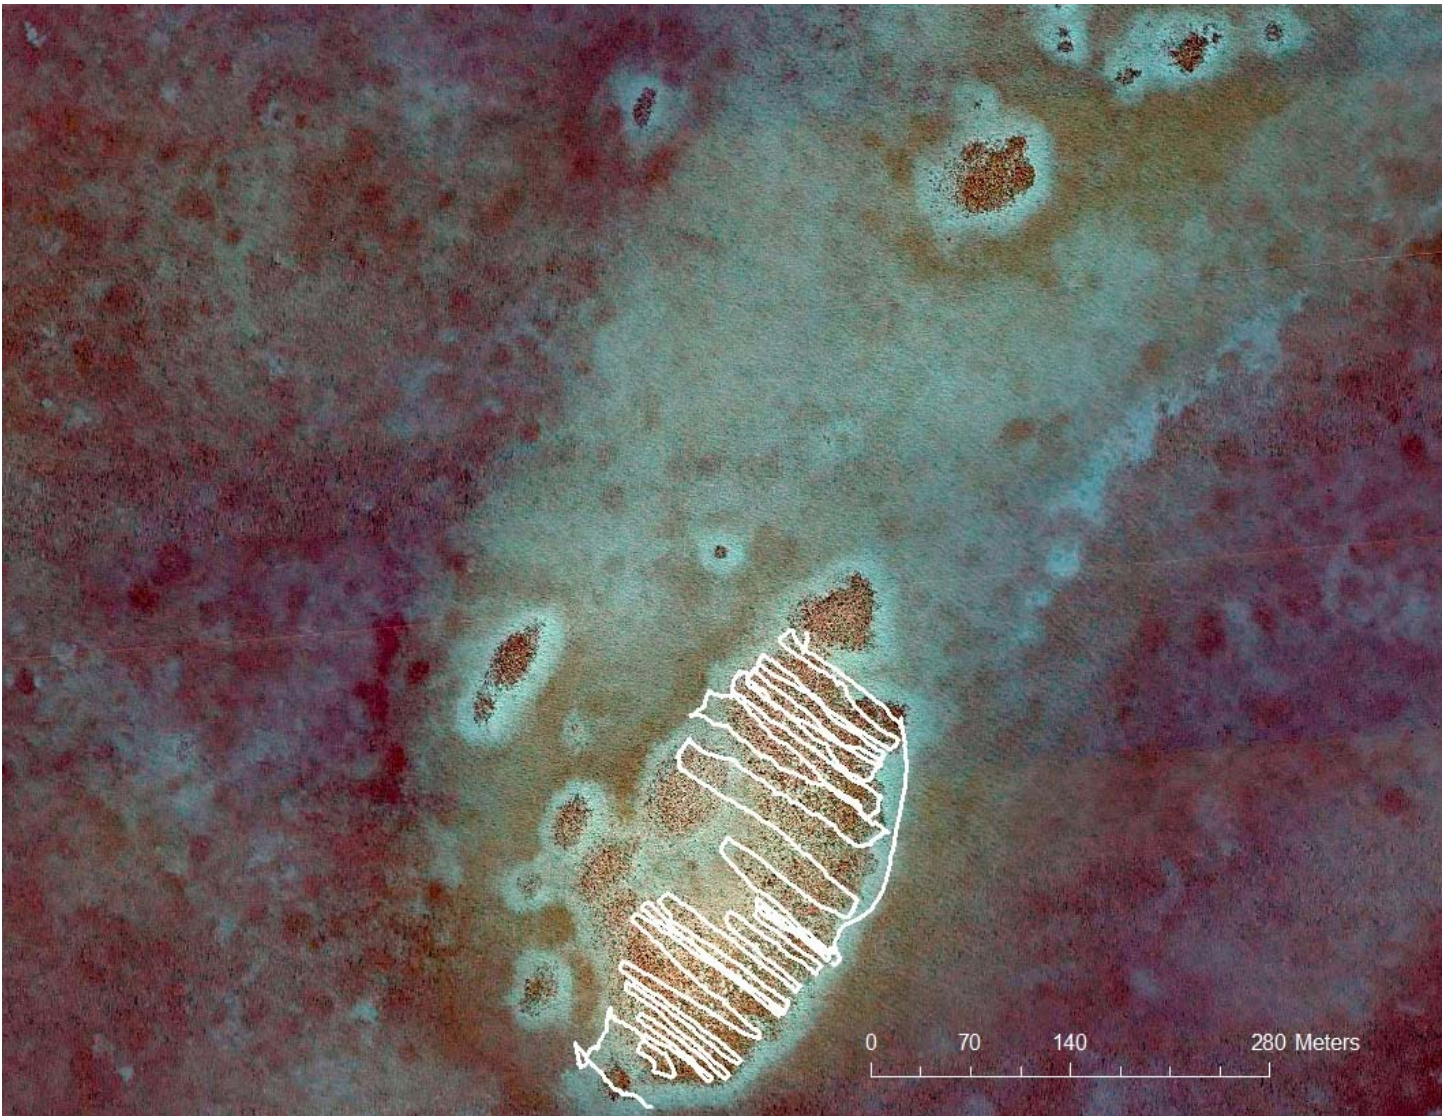

Cannon Patch 2015

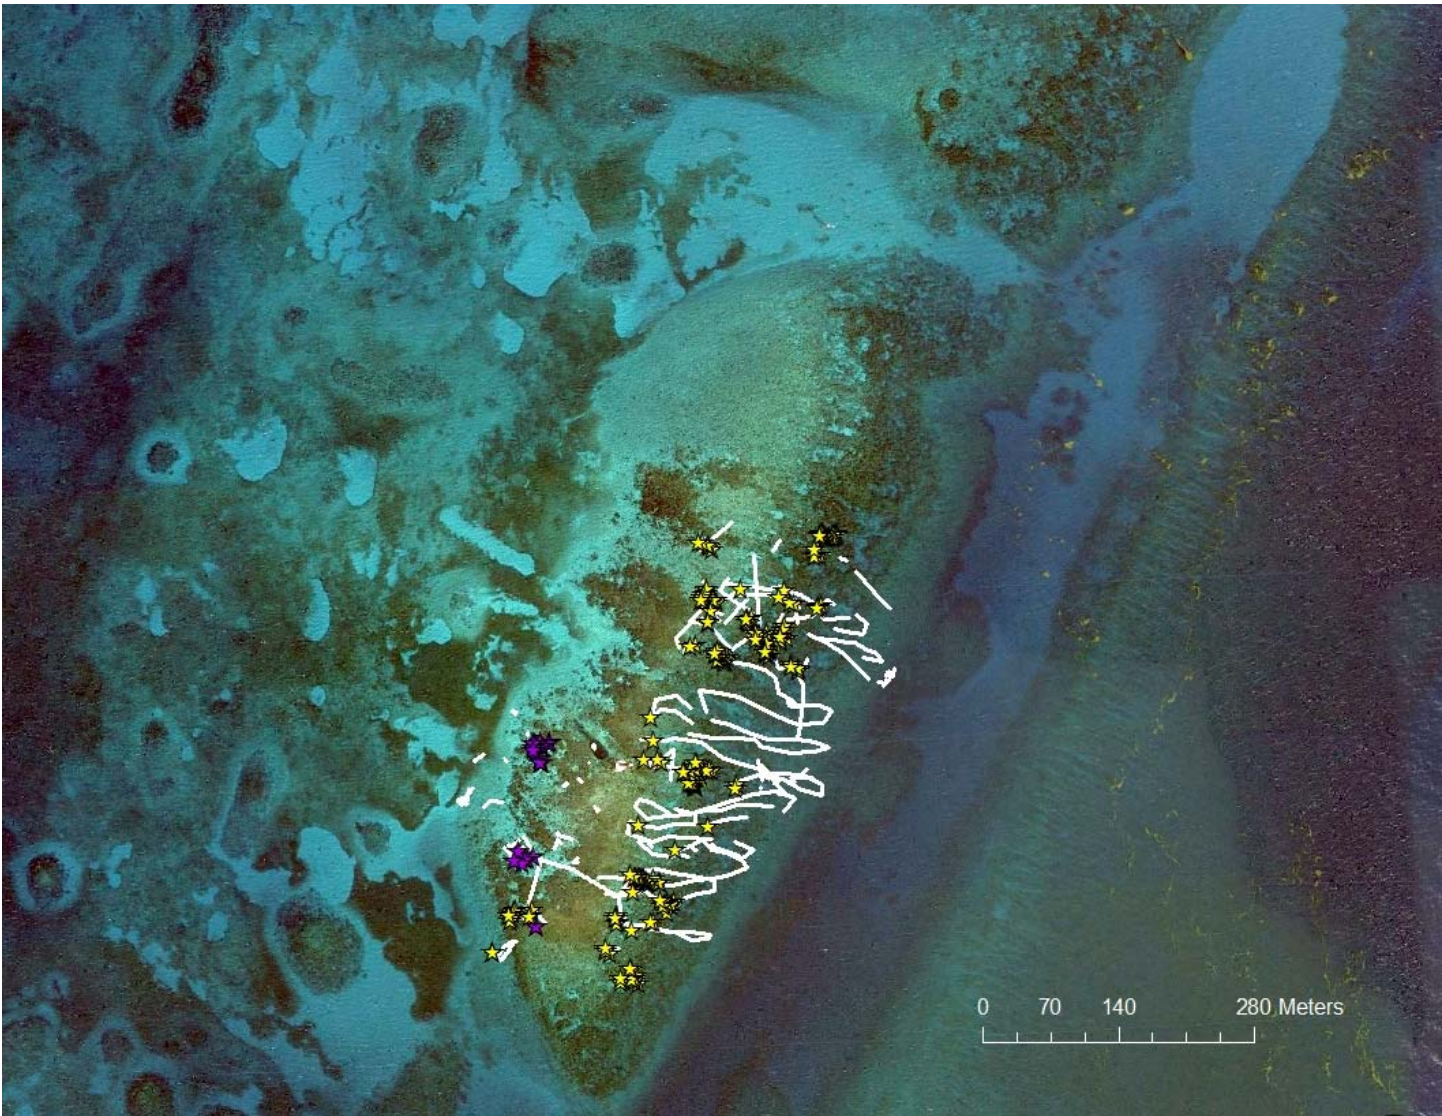

Carysfort Reef 2005



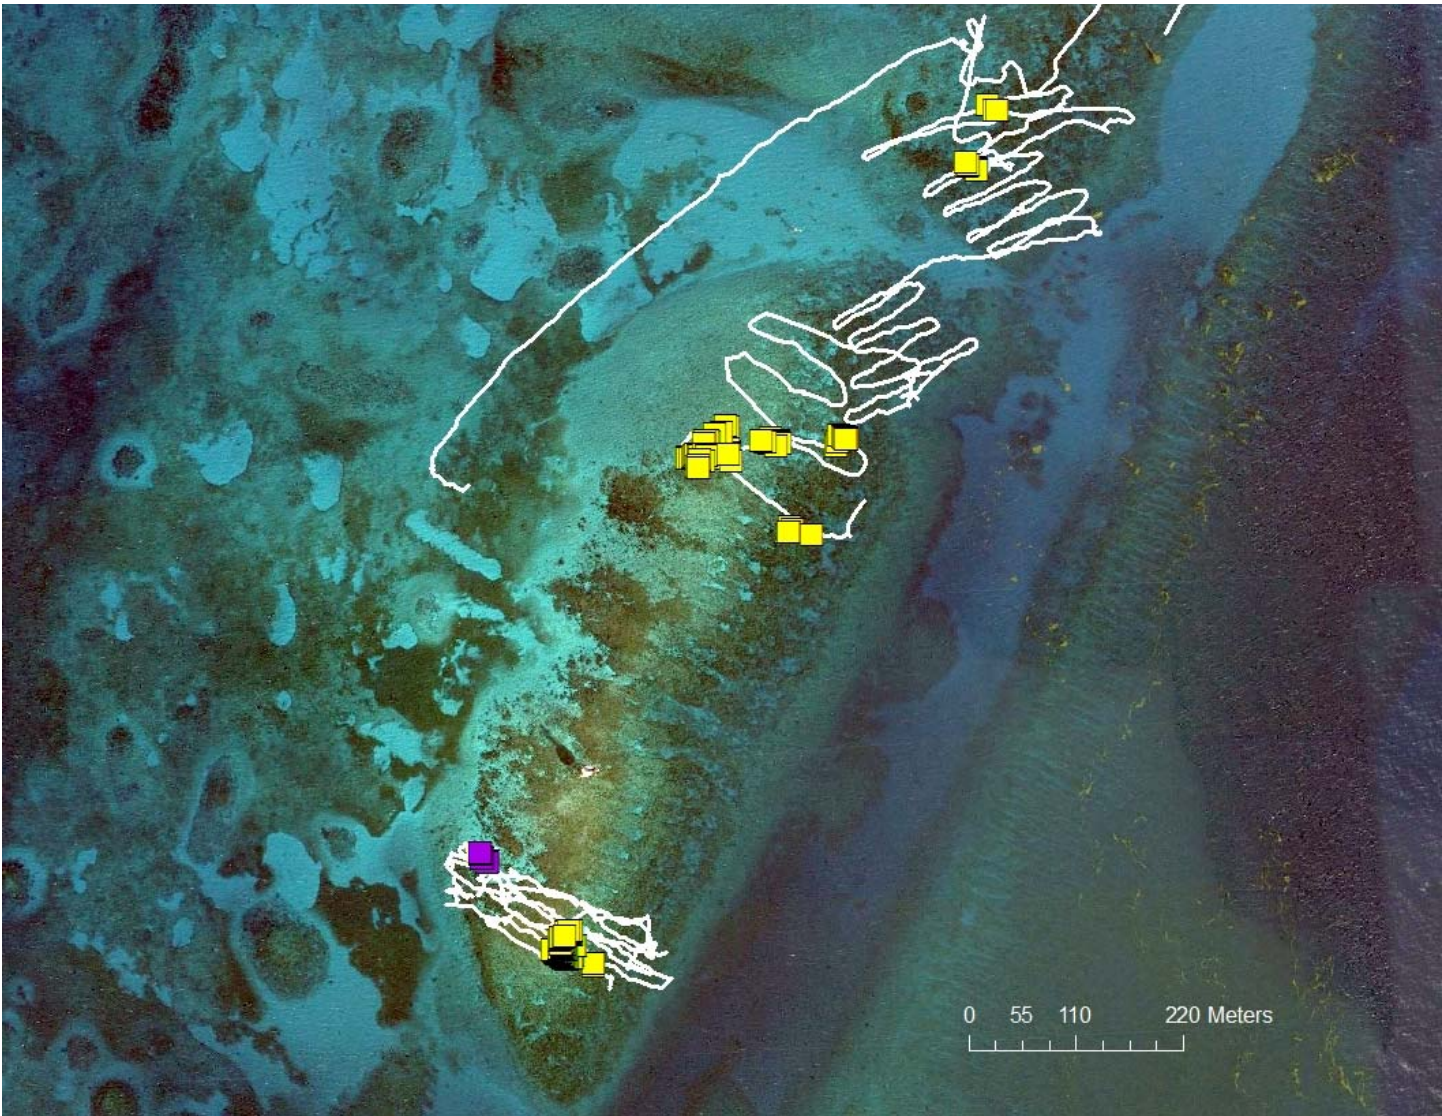

Carysfort Reef 2014

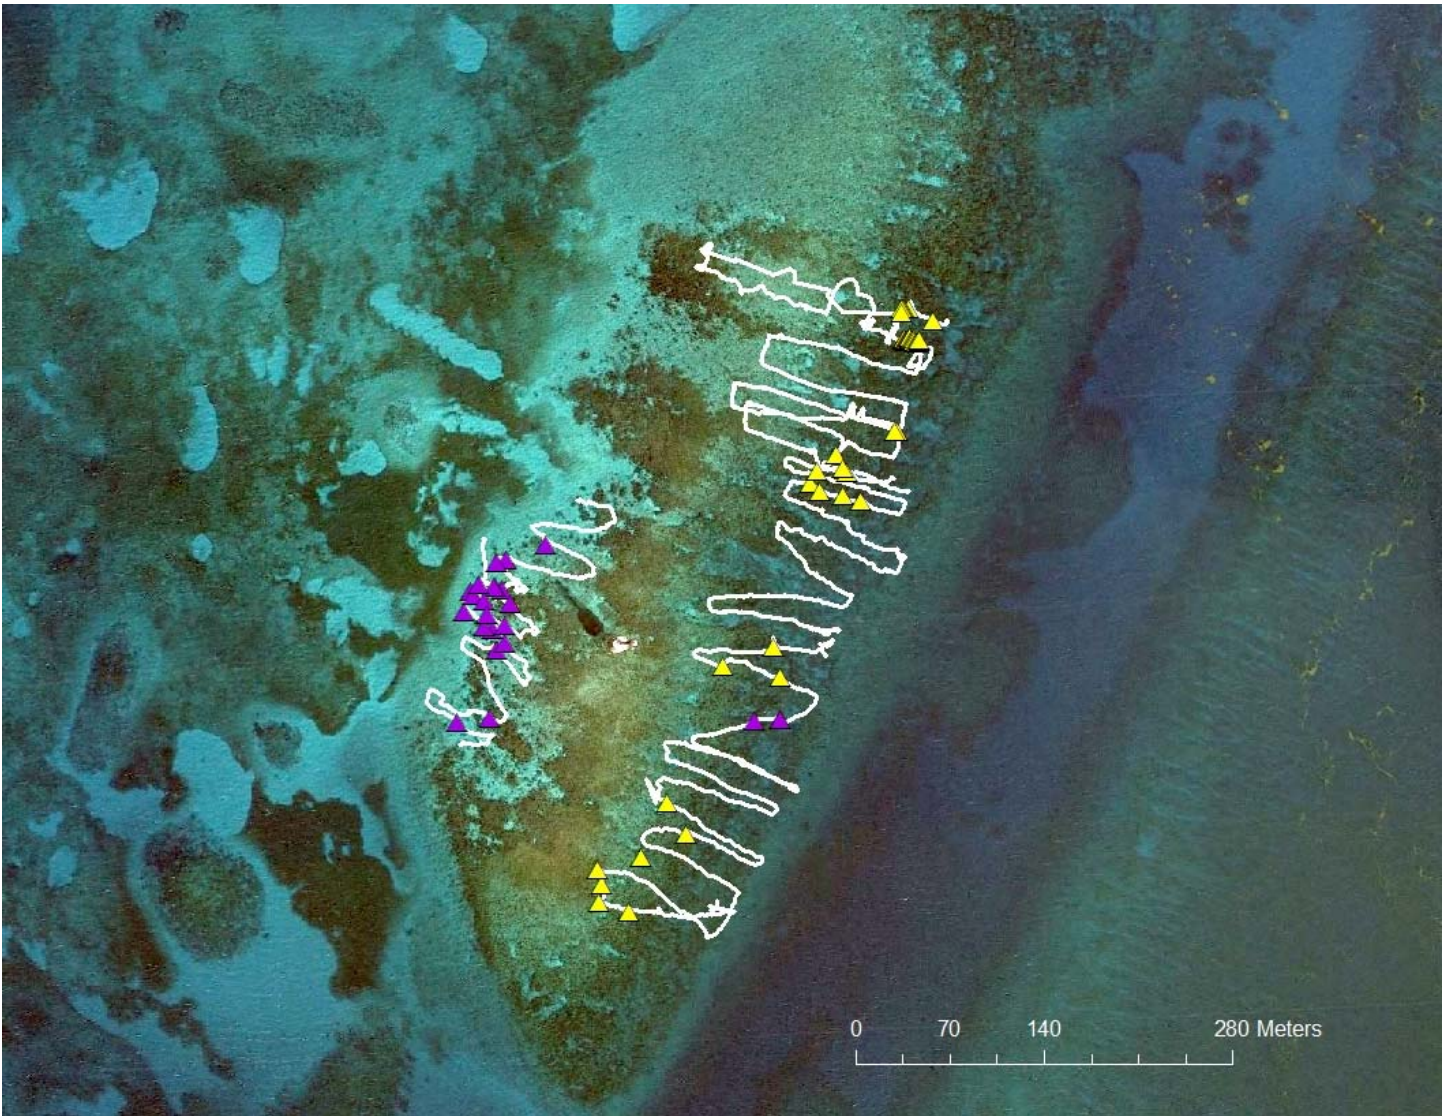

Carysfort Reef 2015

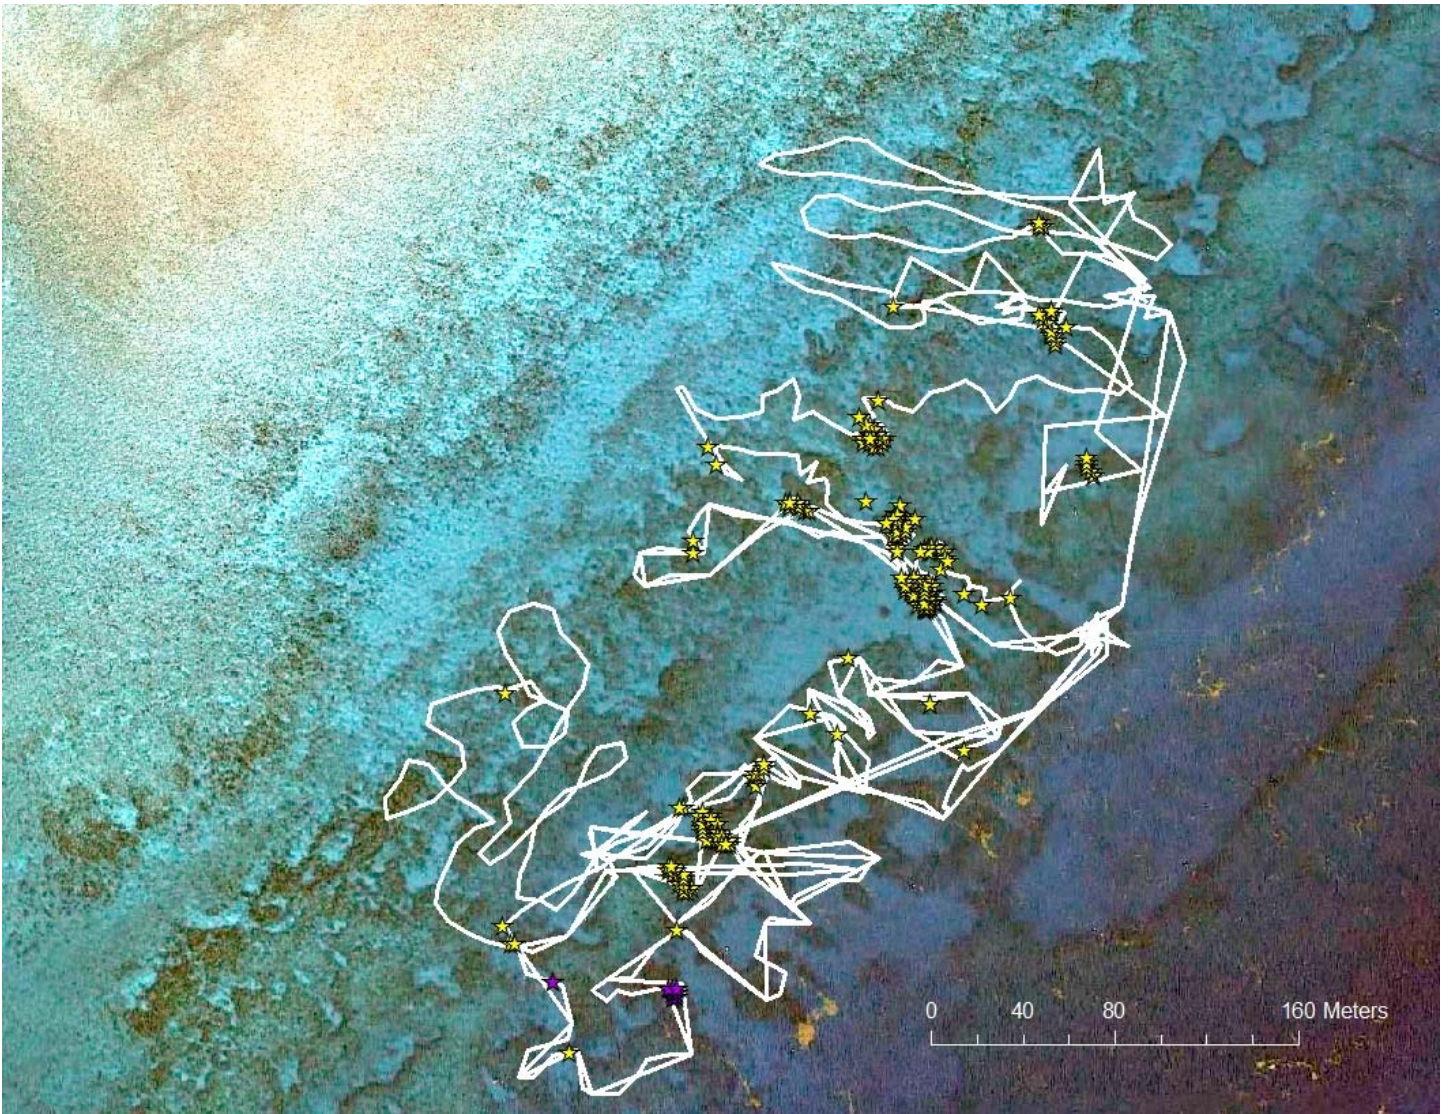

French Reef 2007

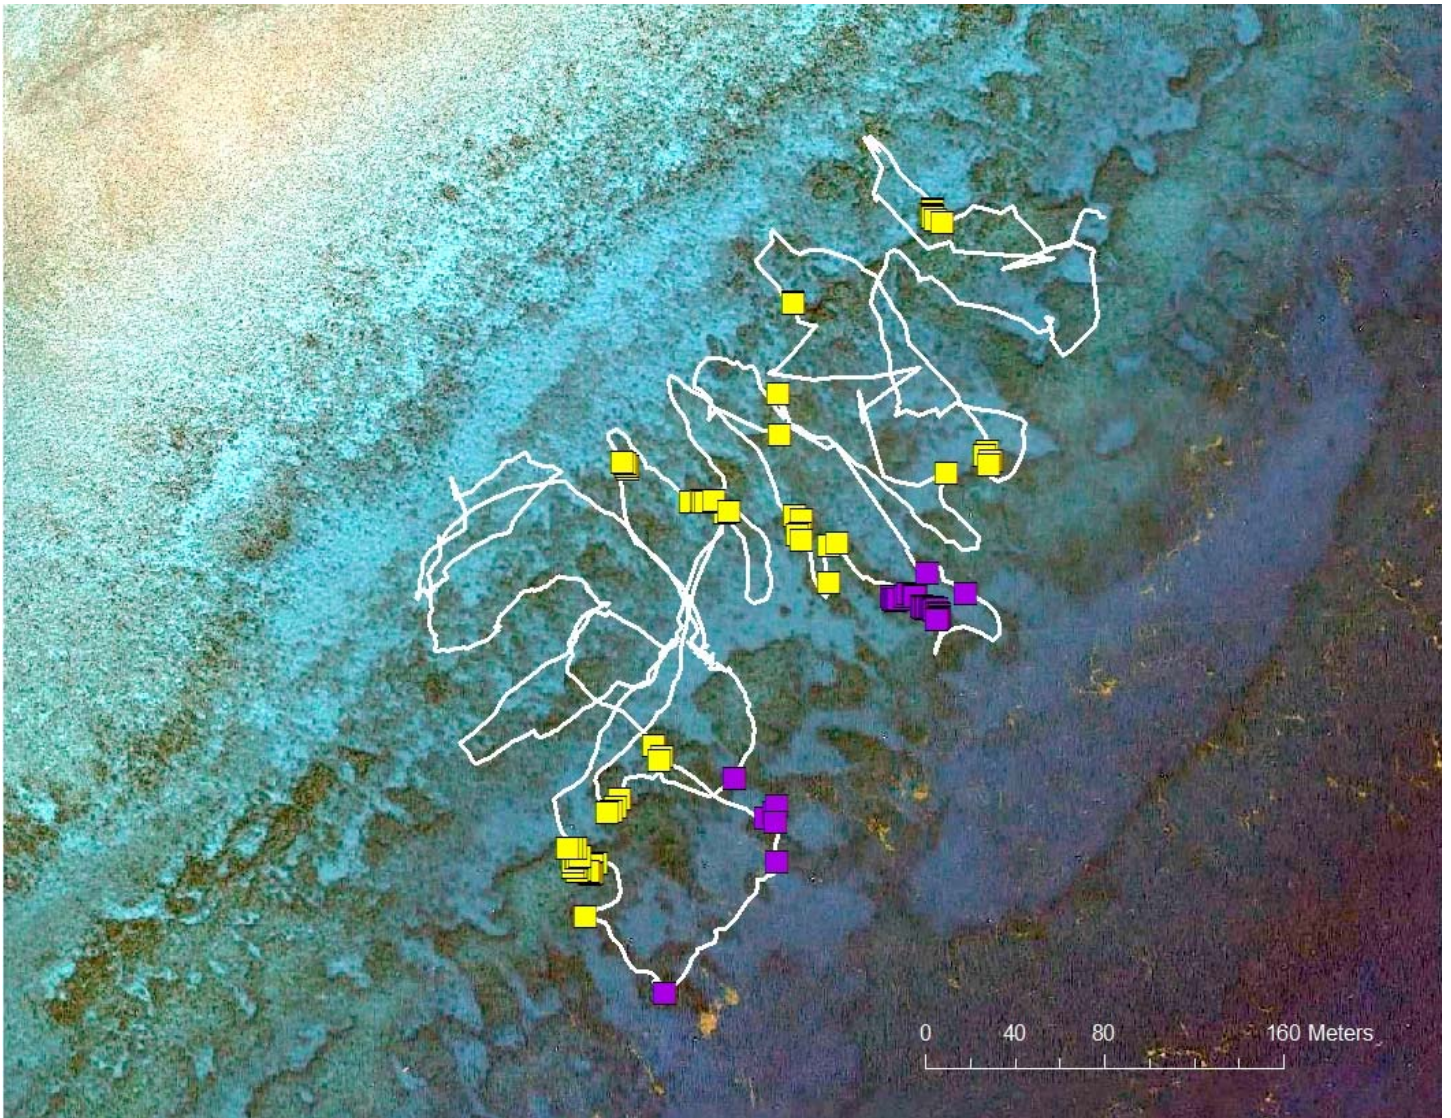

French Reef 2014

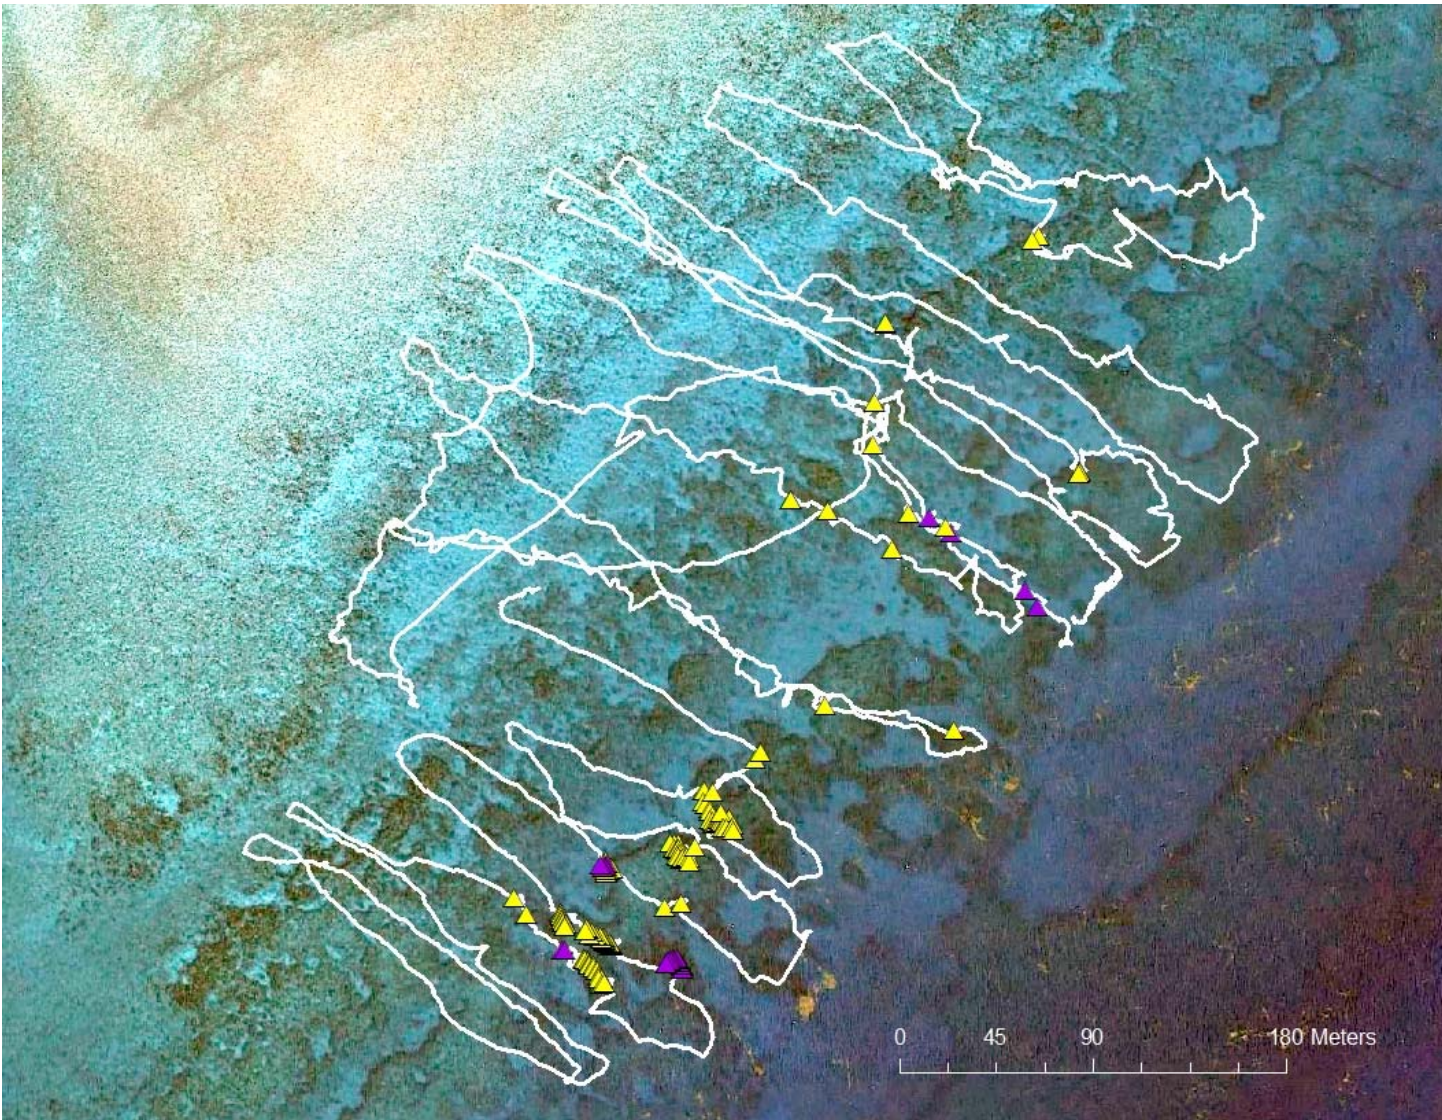

French Reef 2015

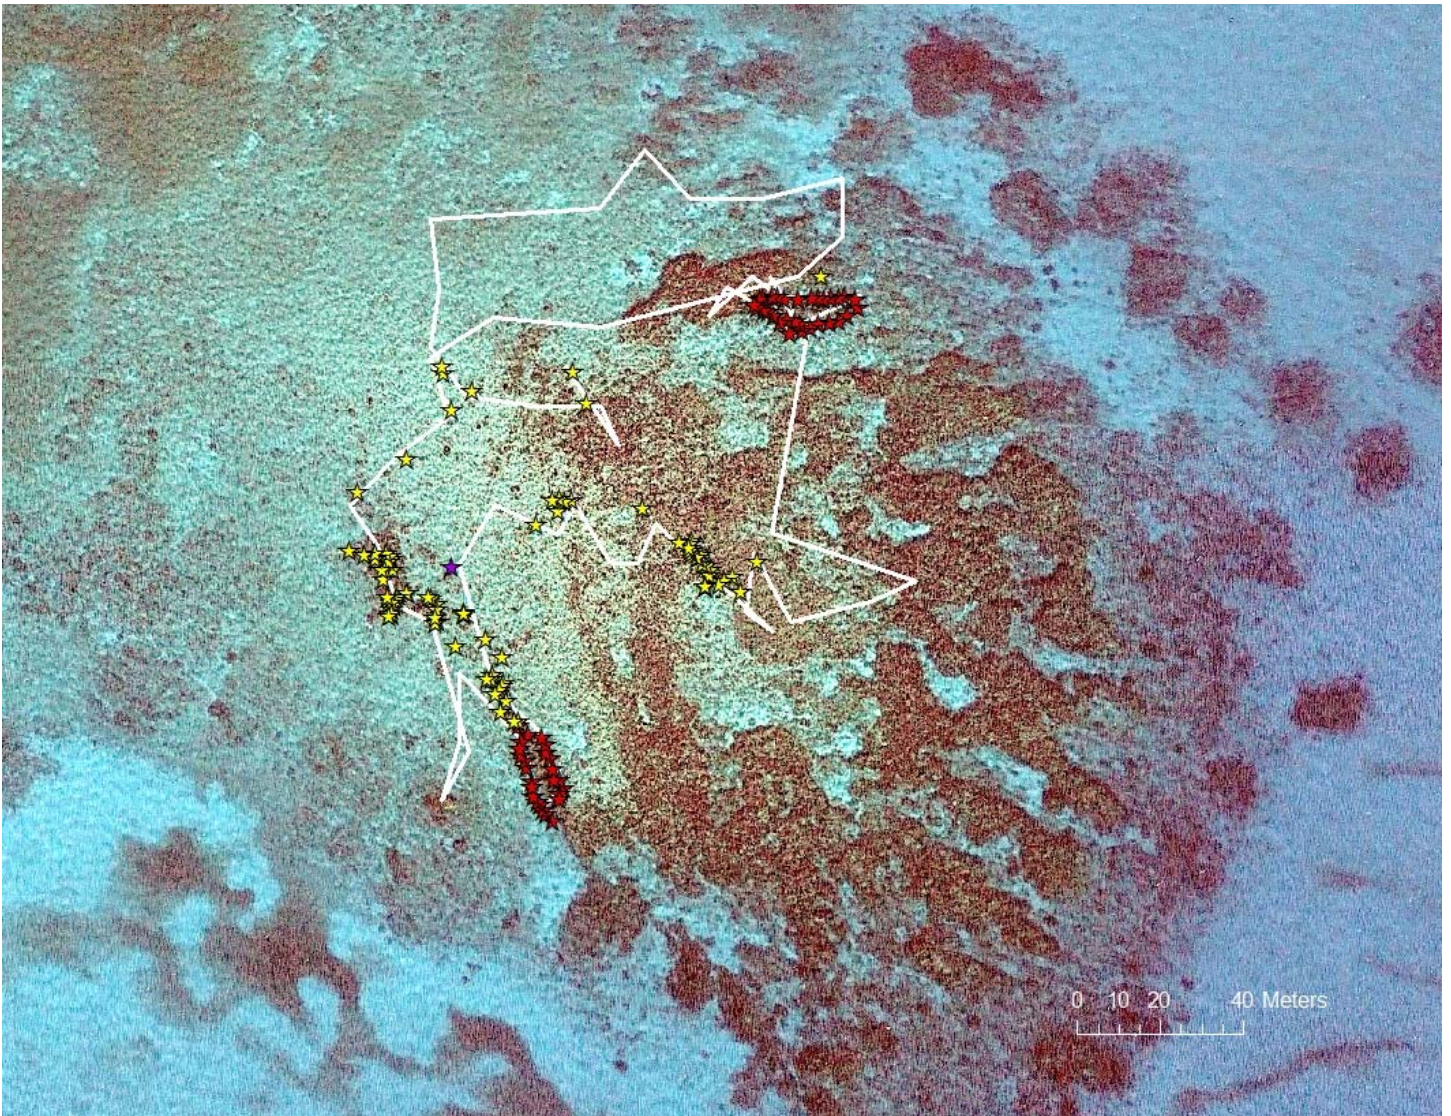

Little Grecian 2006

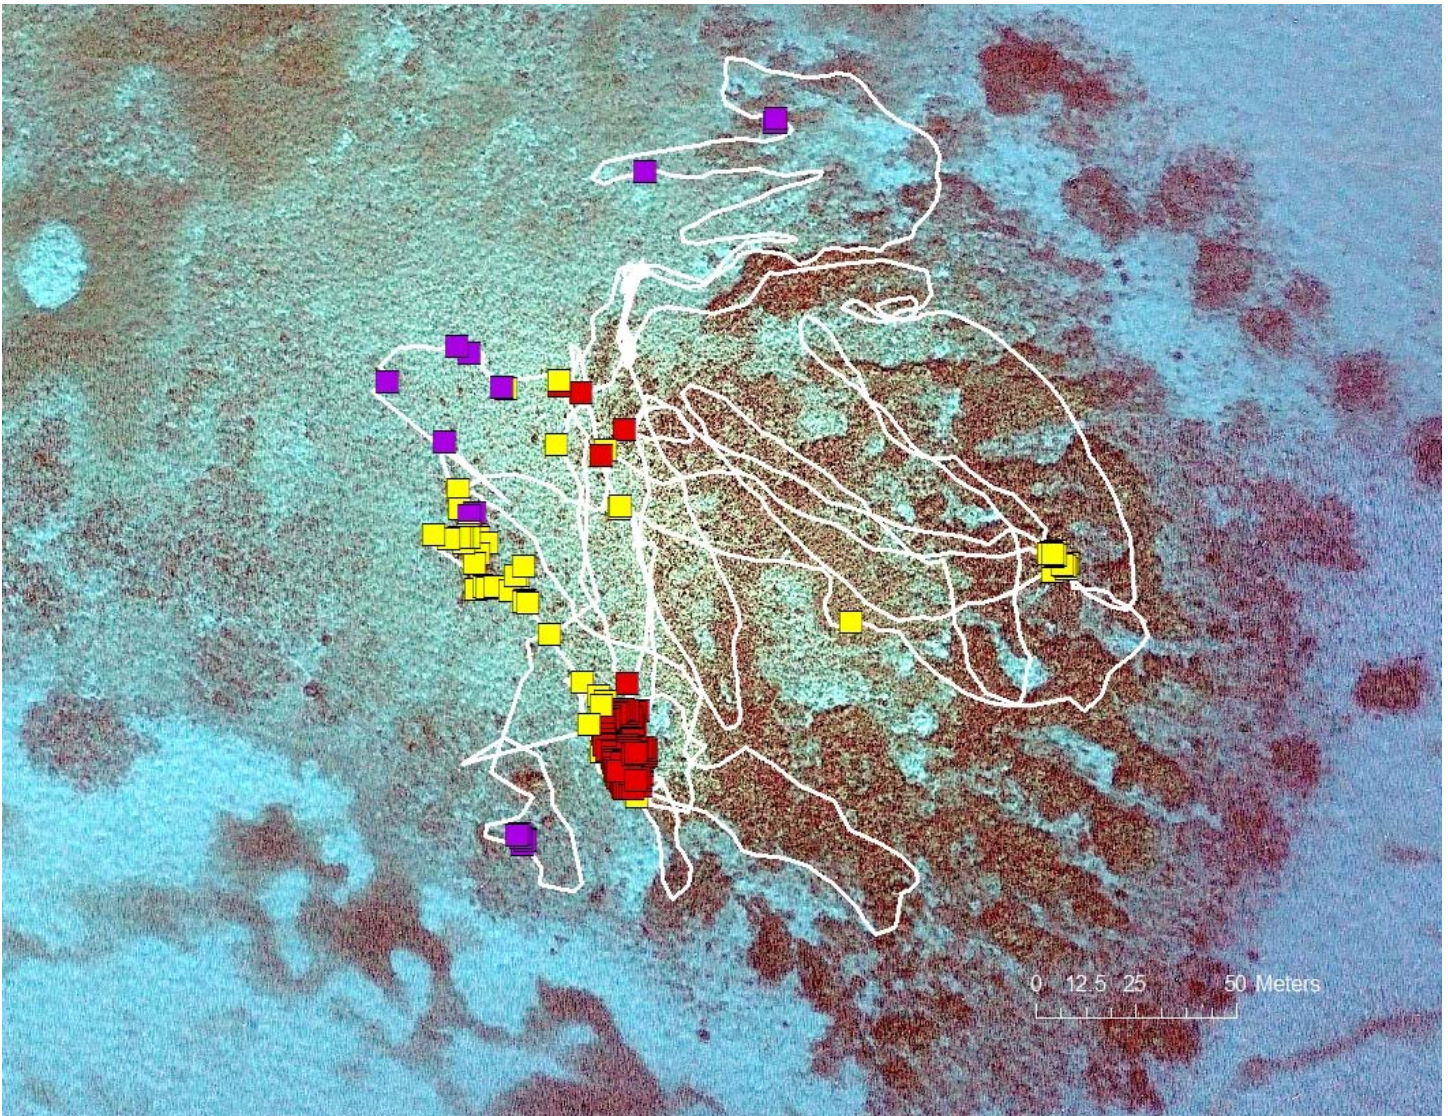

Little Grecian 2013

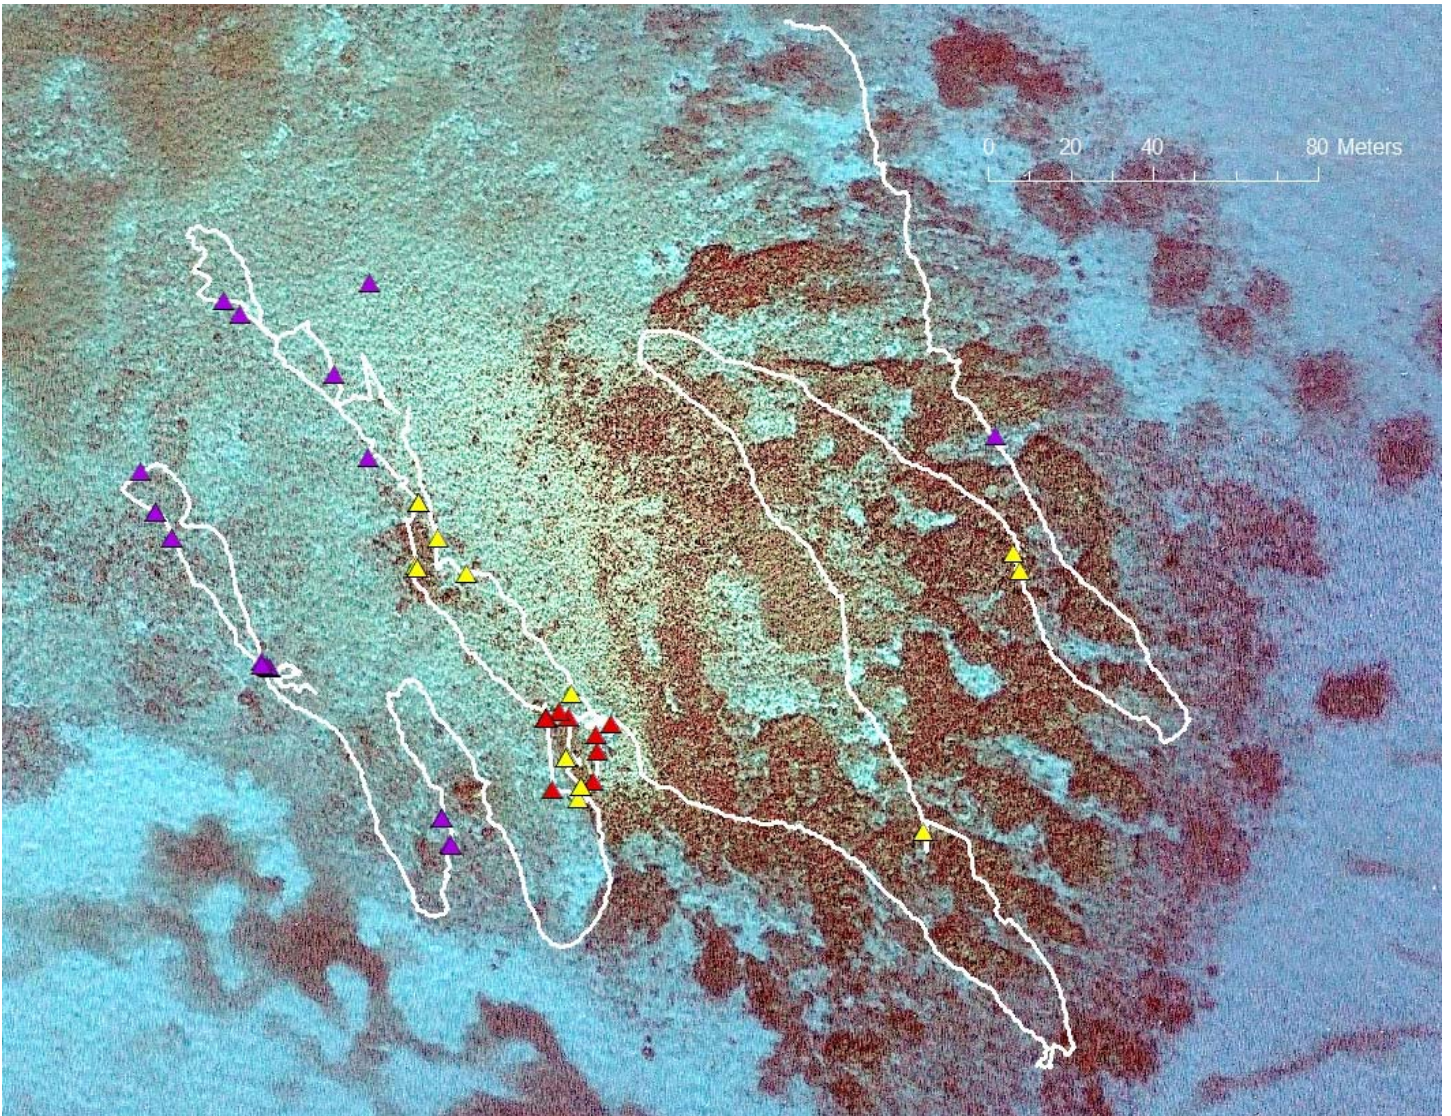

Little Grecian 2015



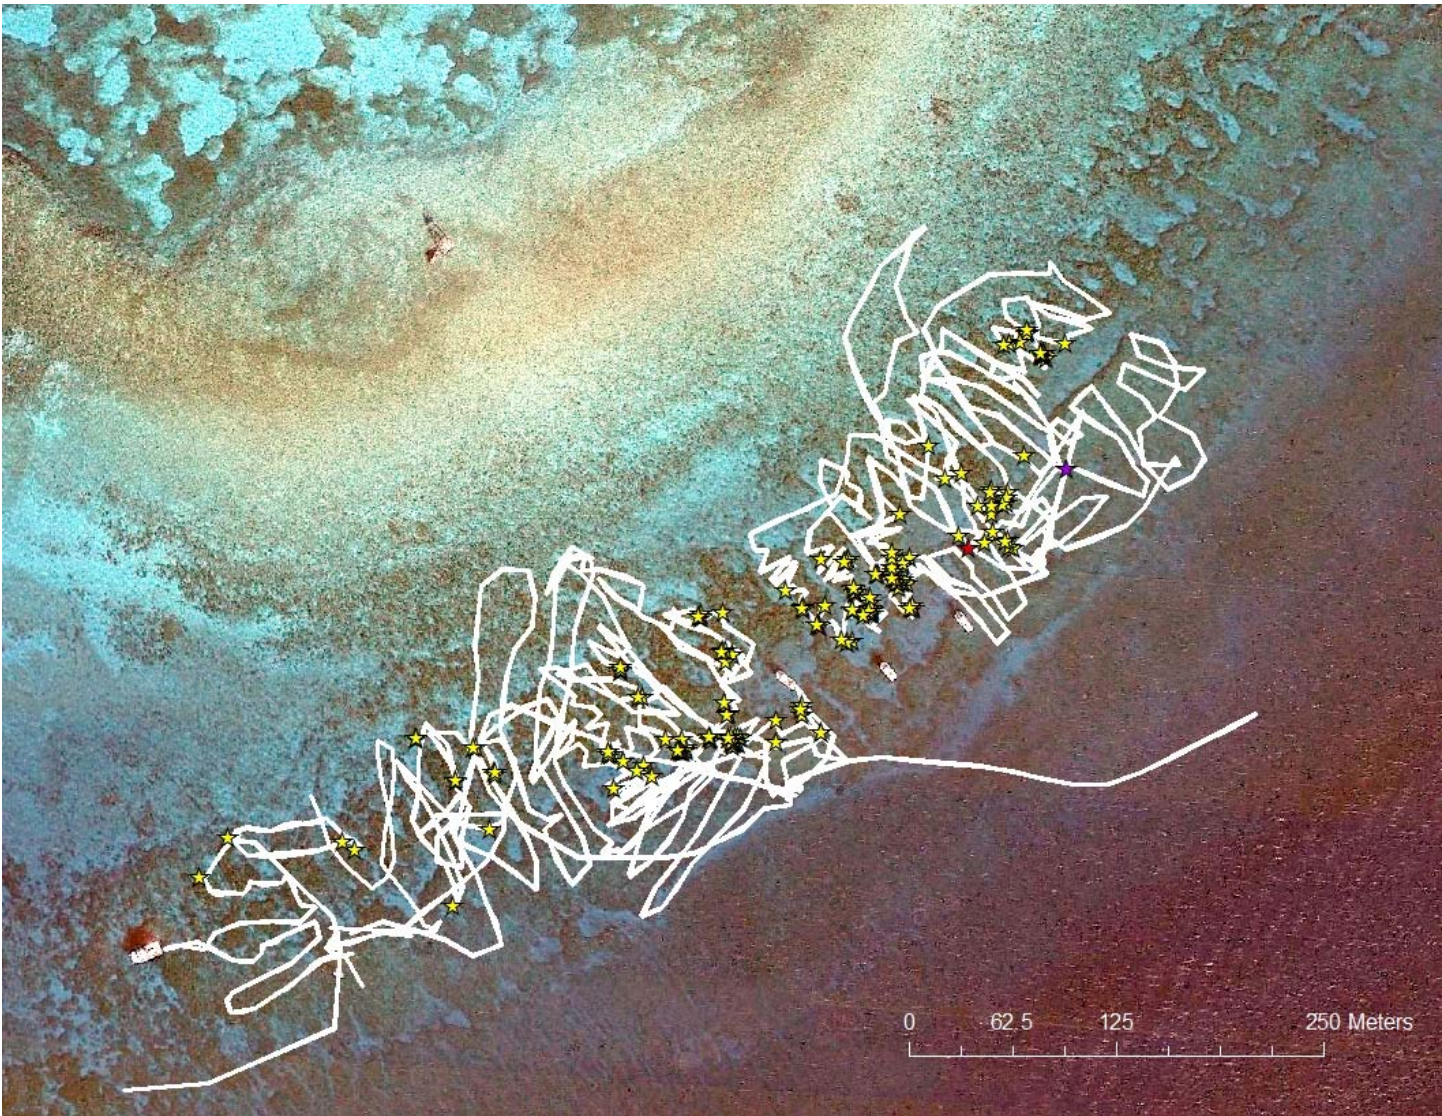

Molasses Reef 2006

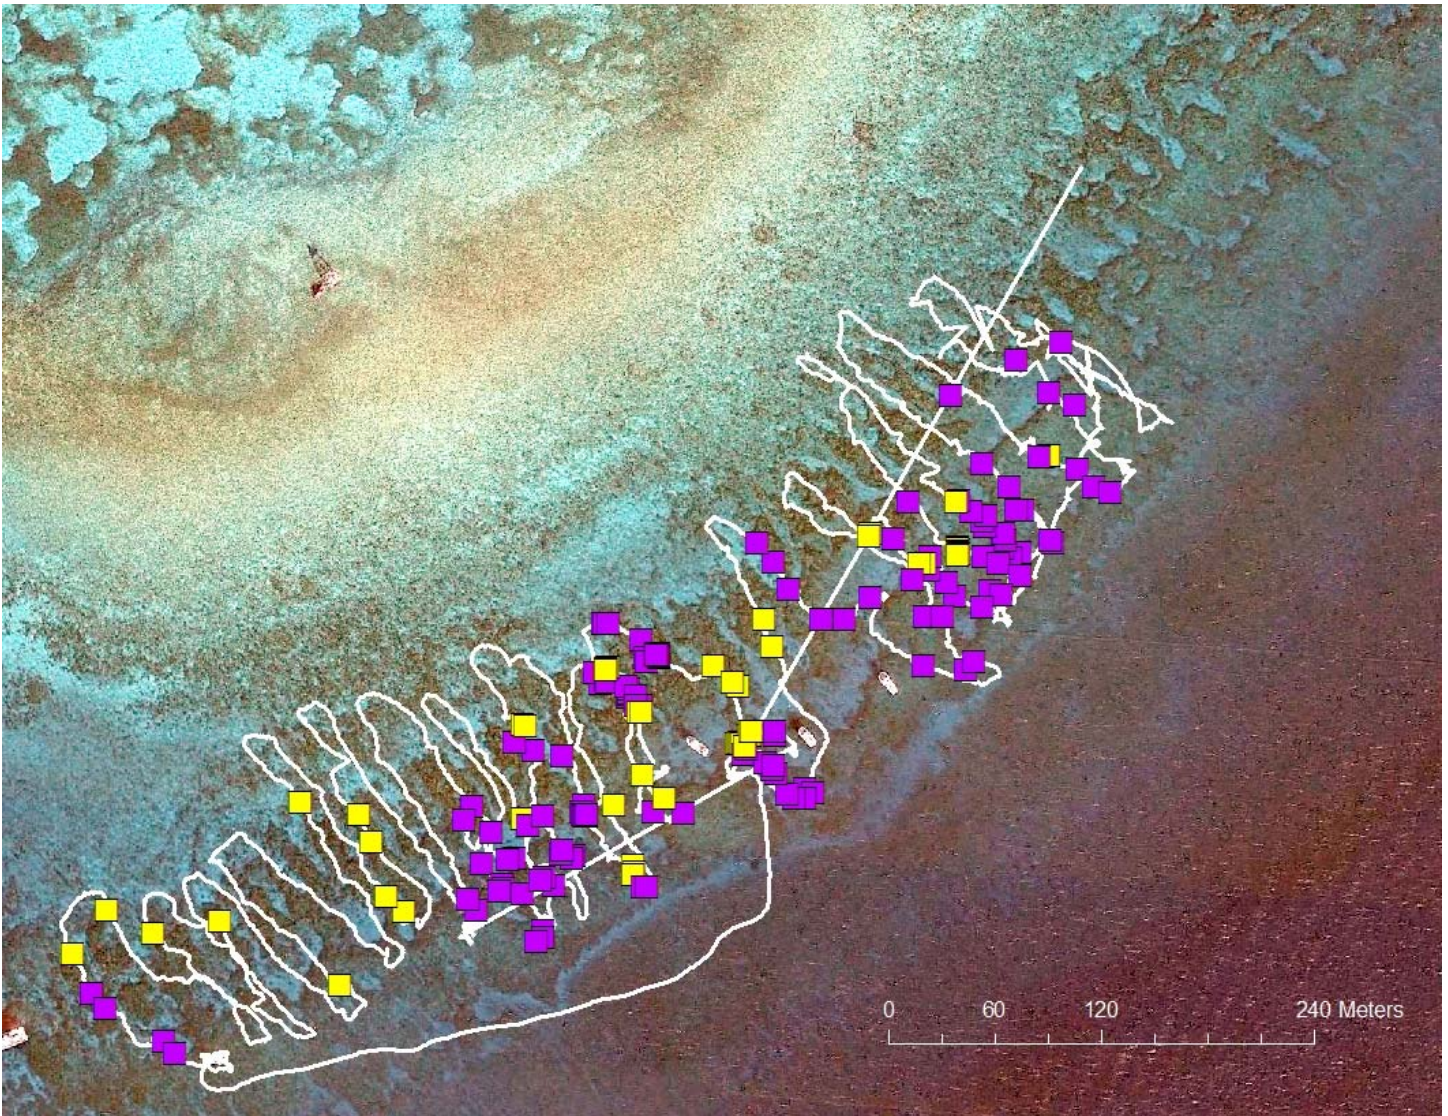

Molasses Reef 2014

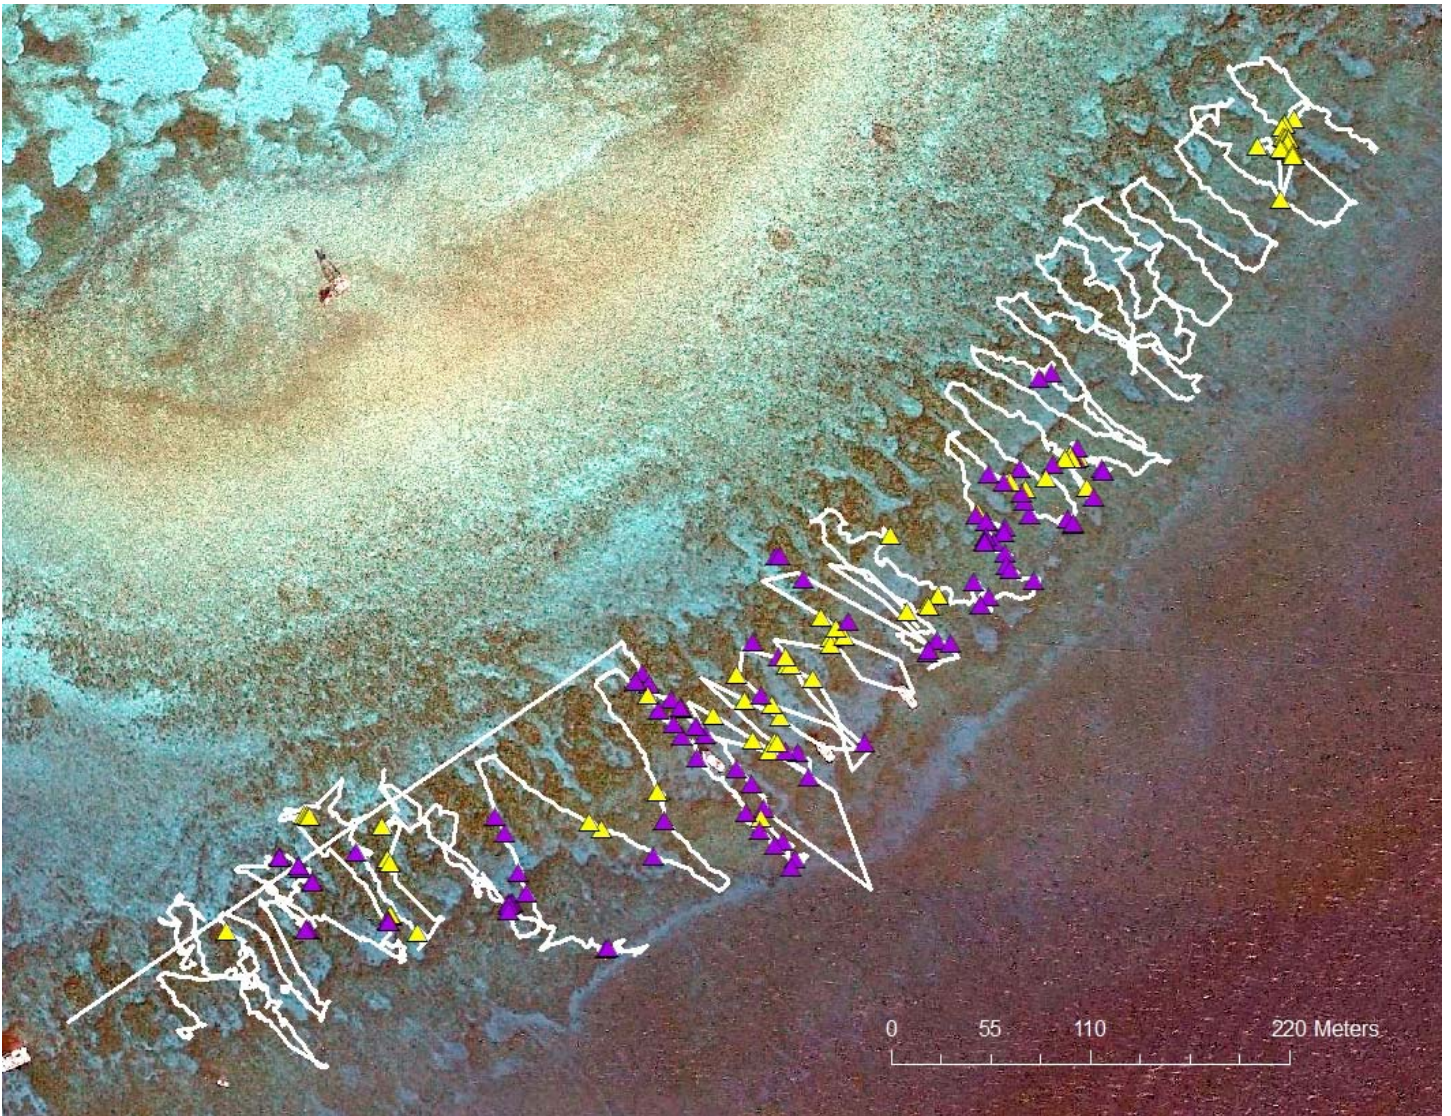

Molasses Reef 2015

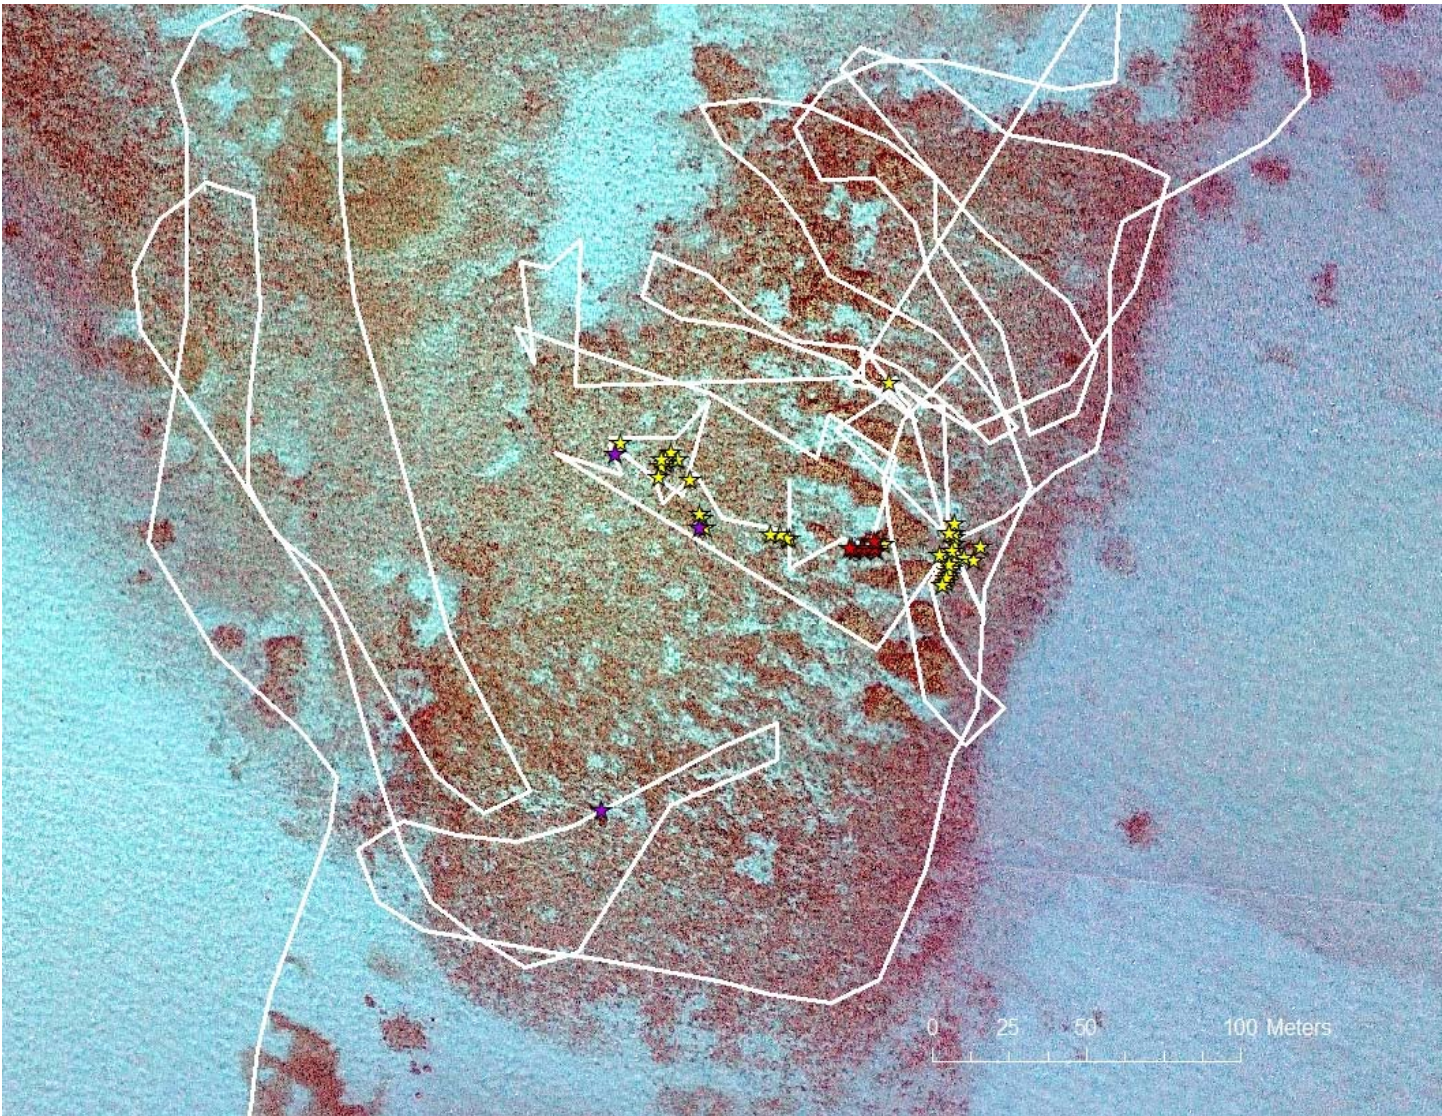

North Dry Rocks 2006

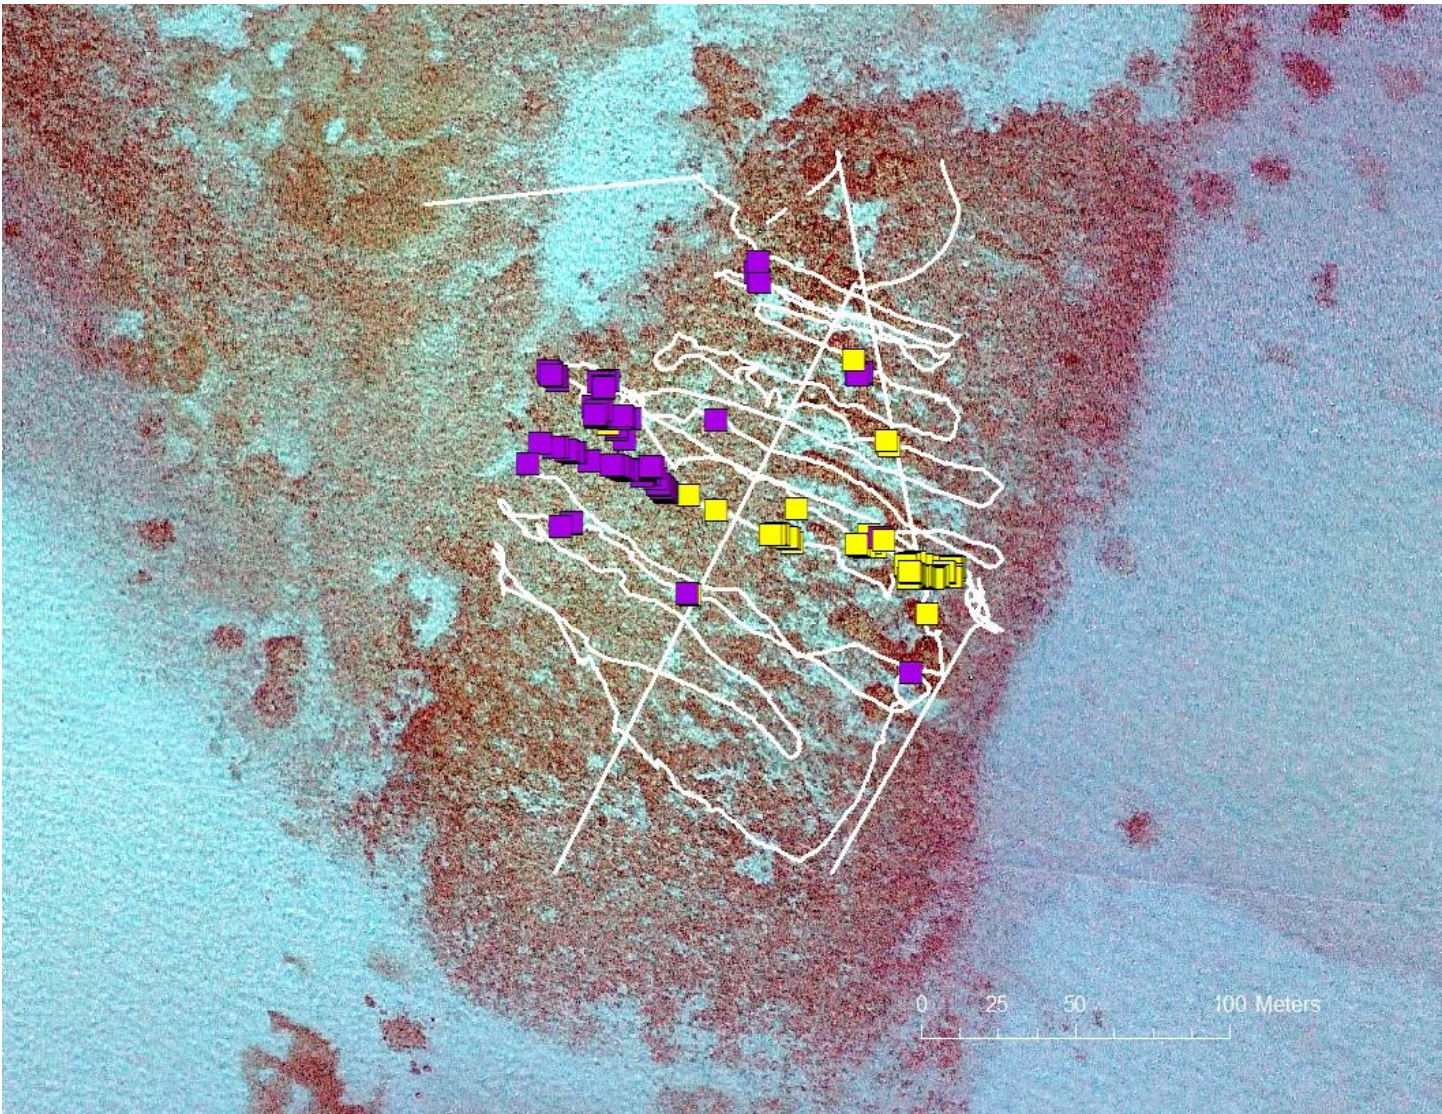

North Dry Rocks 2014

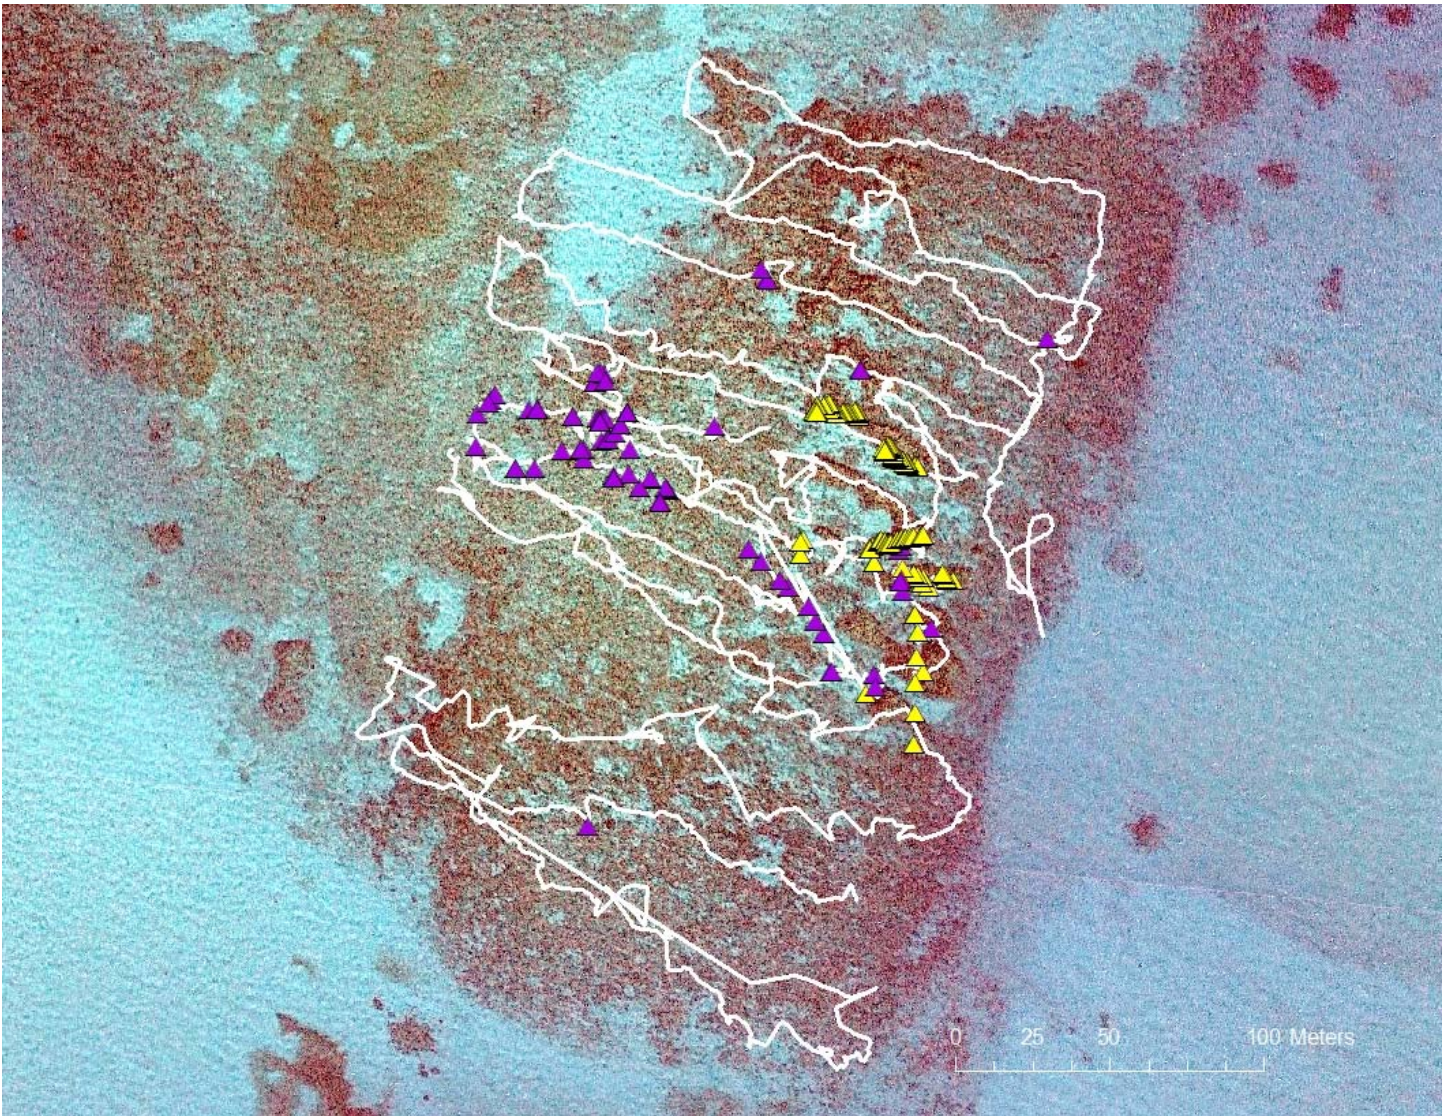

North Dry Rocks 2015

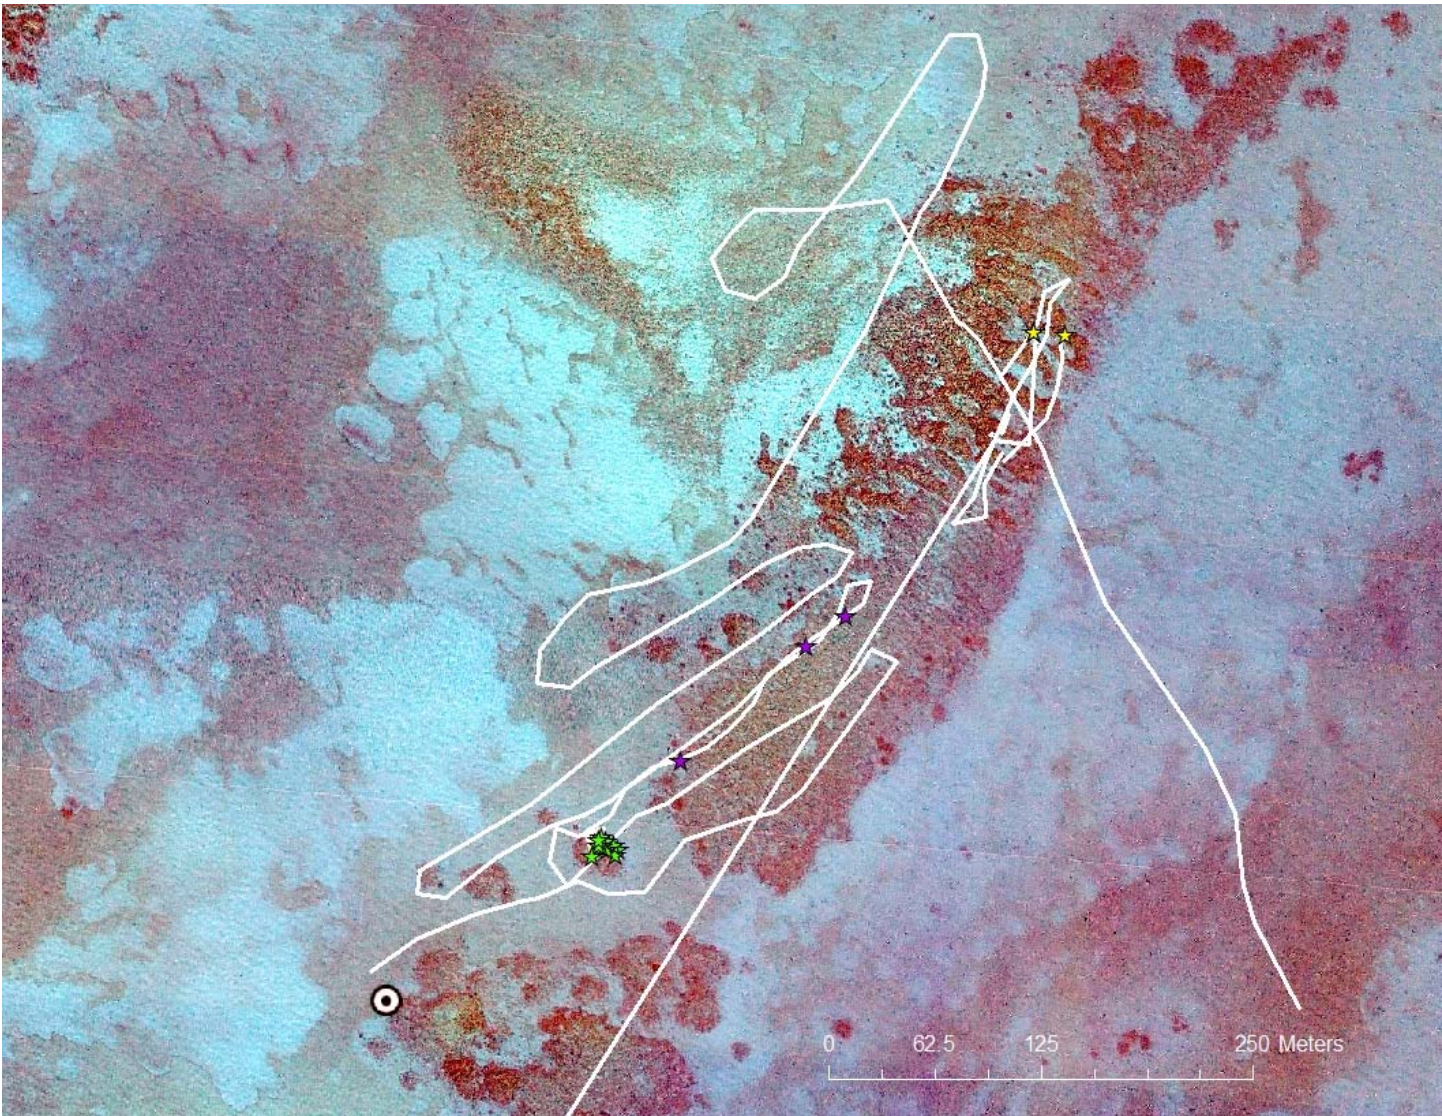

North North Dry Rocks 2006

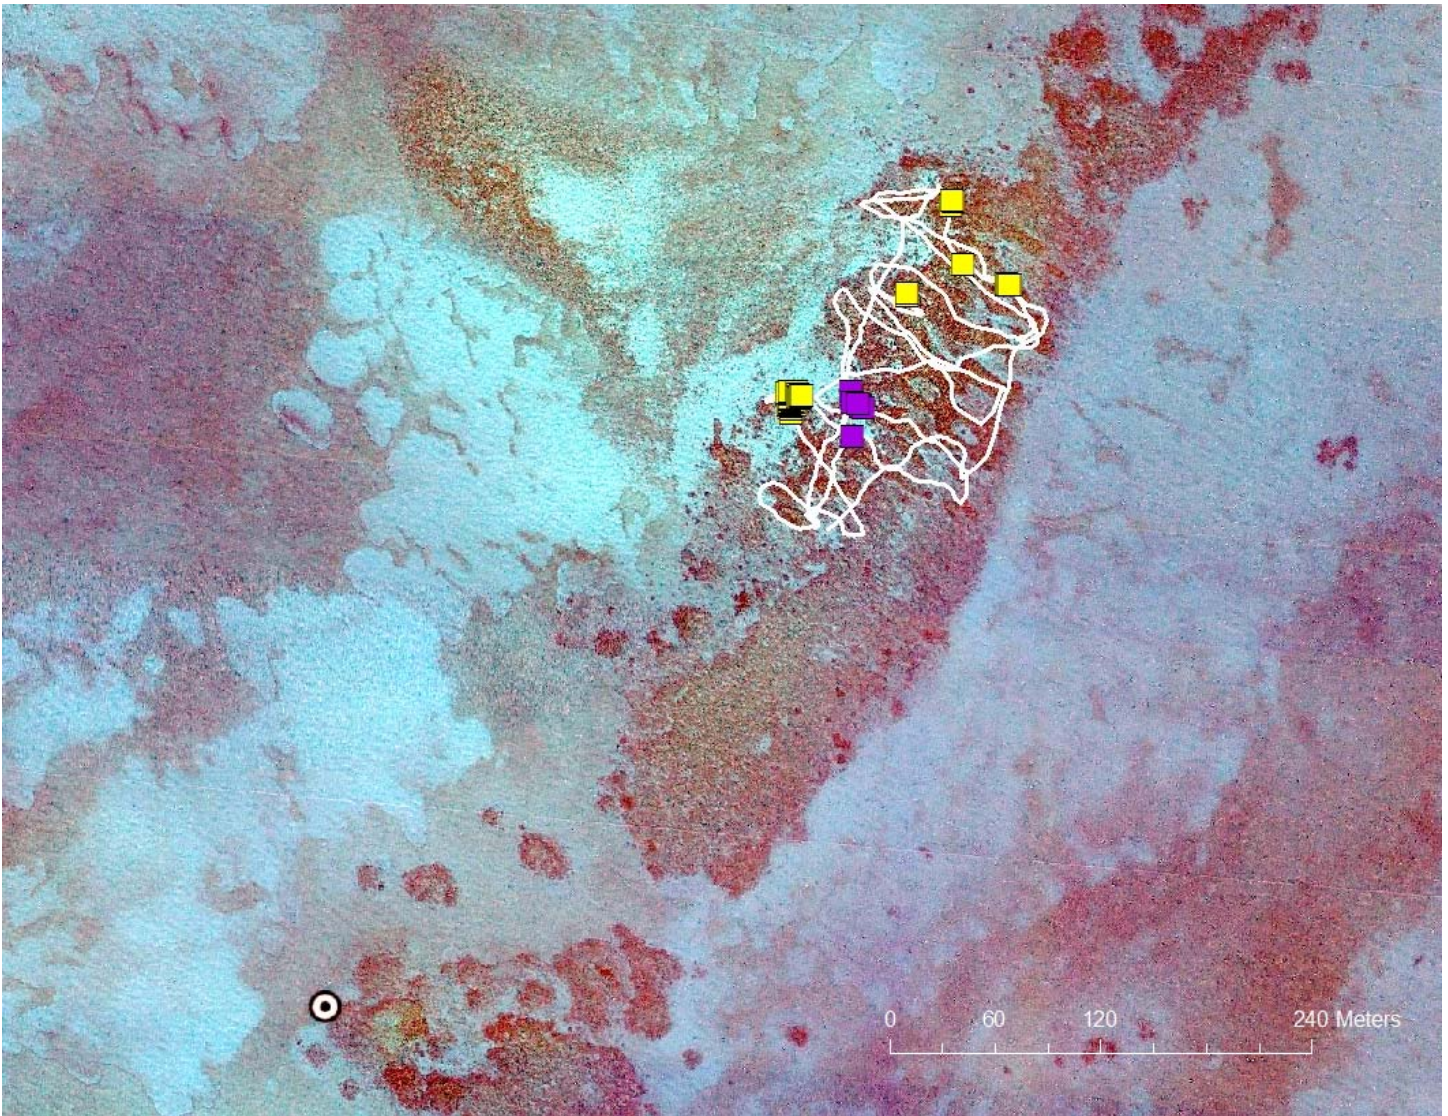

North North Dry Rocks 2013



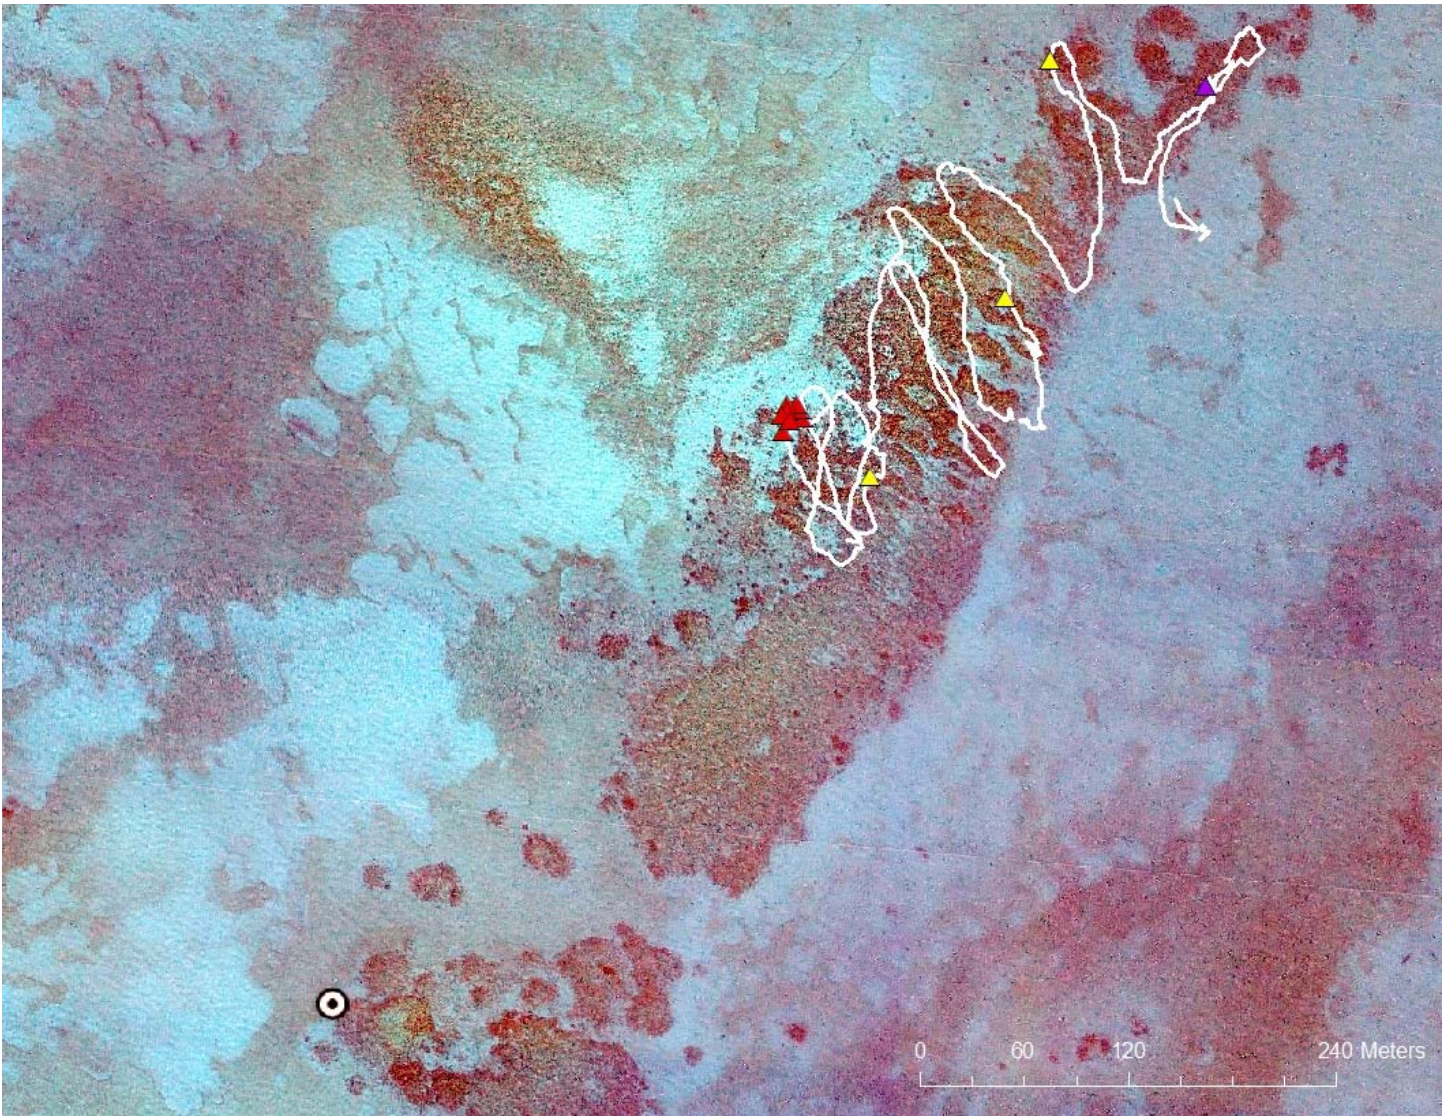

North North Dry Rocks 2015

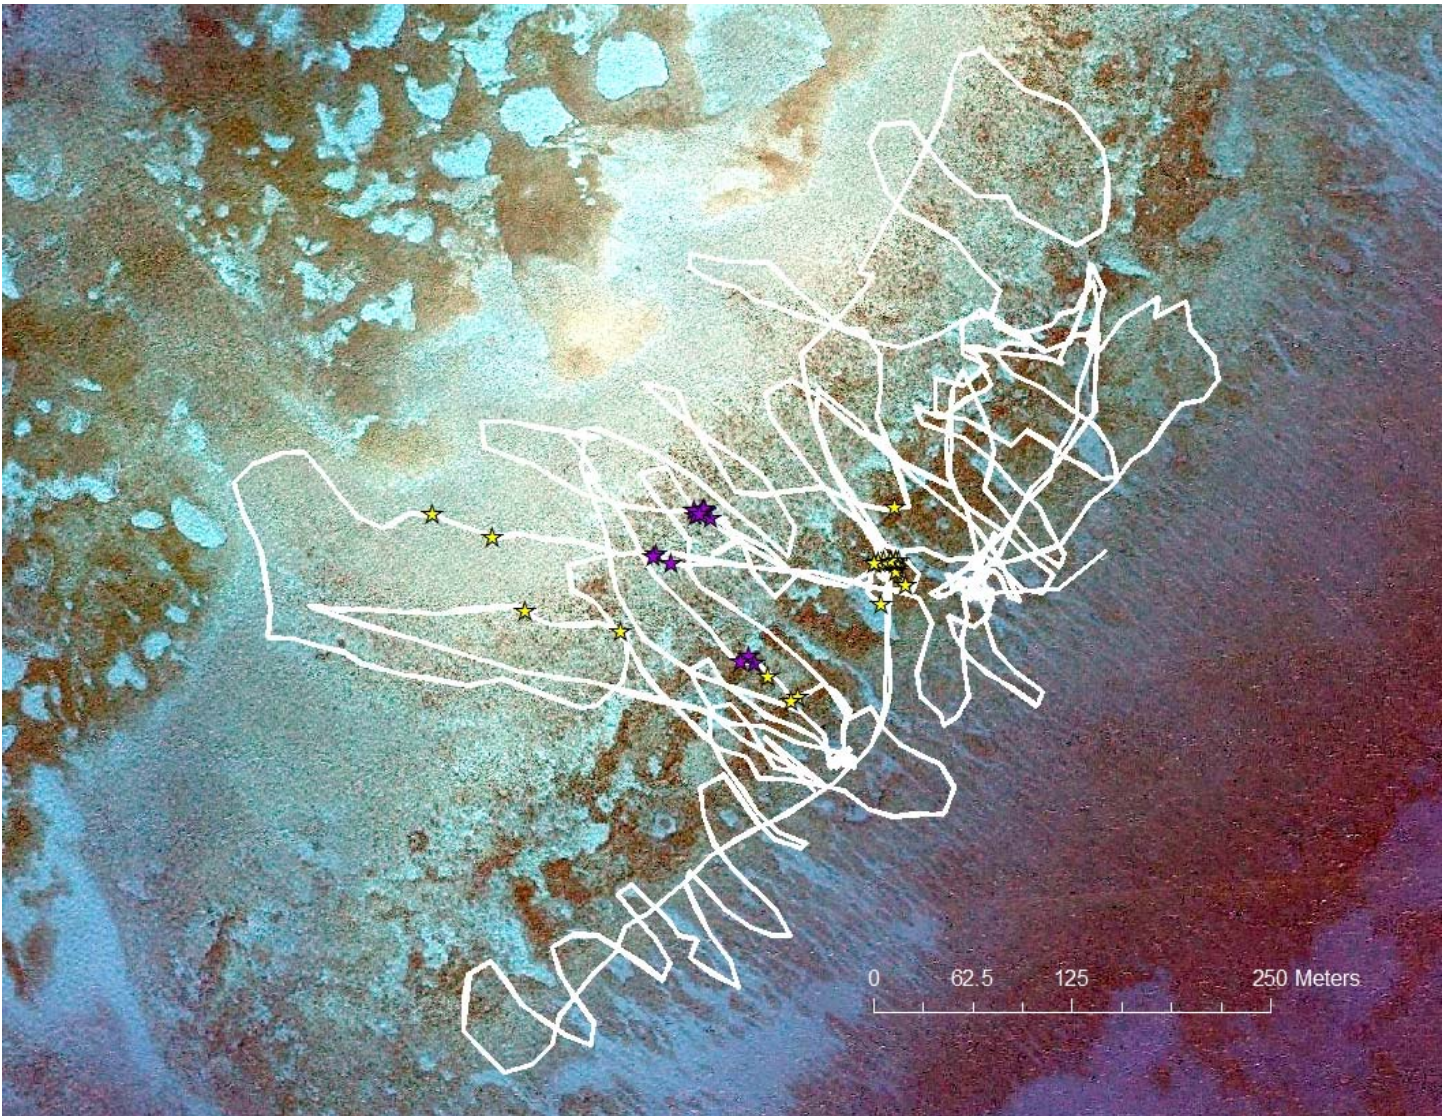

Pickles Reef 2006

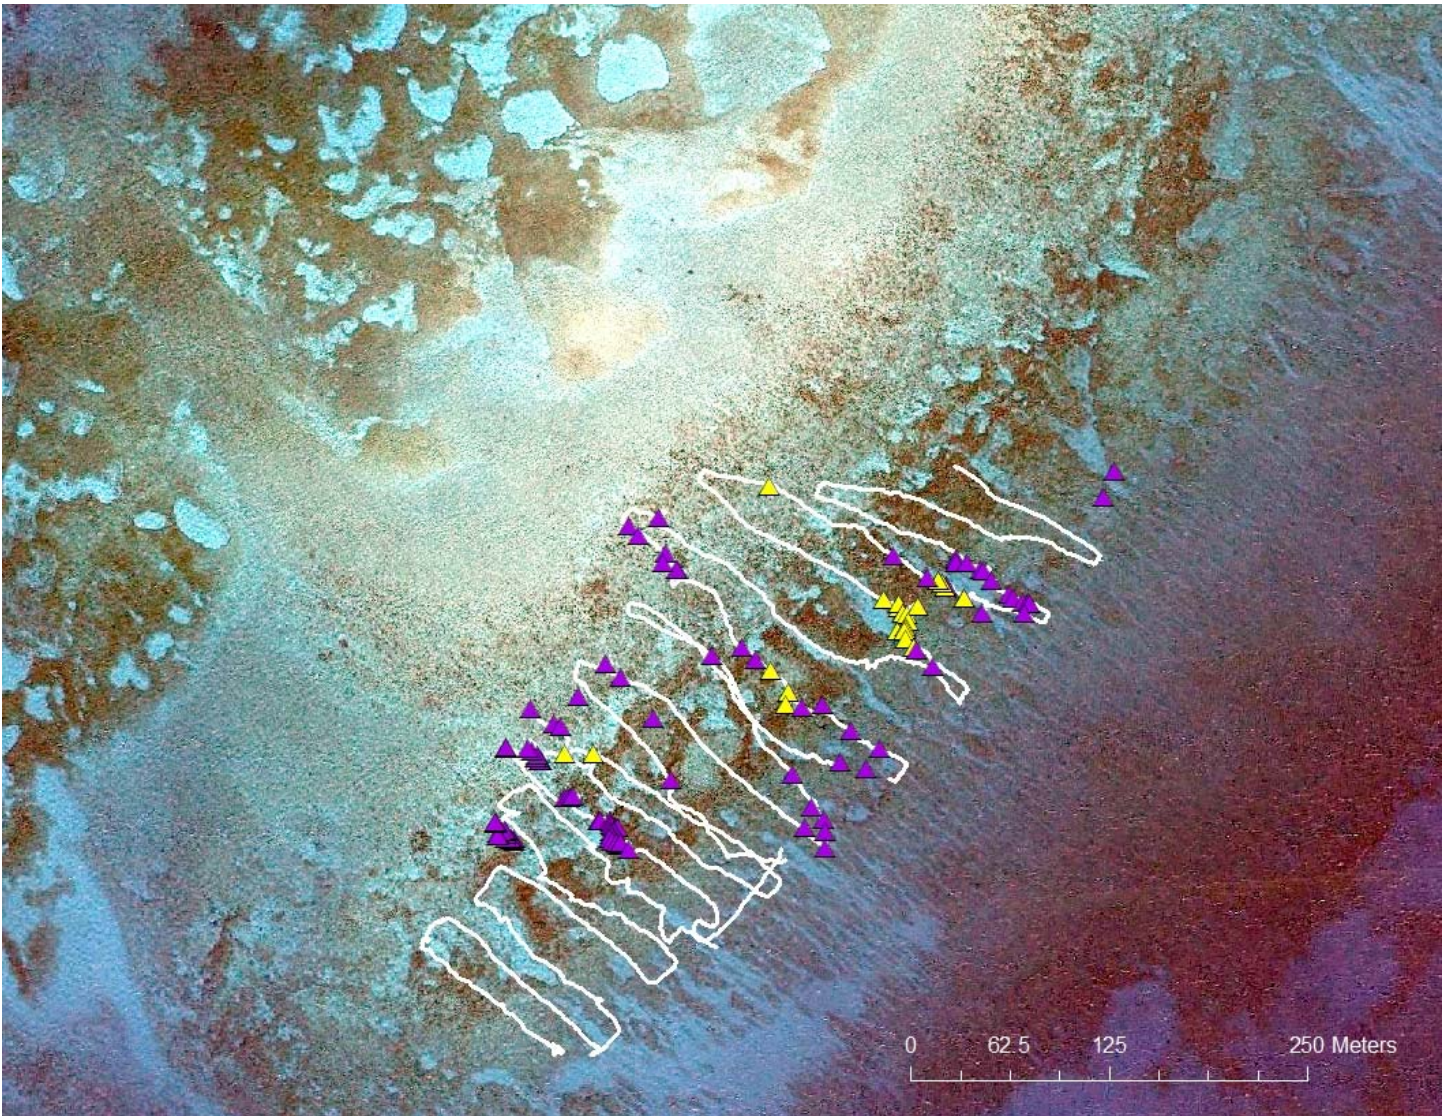

Pickles Reef 2015

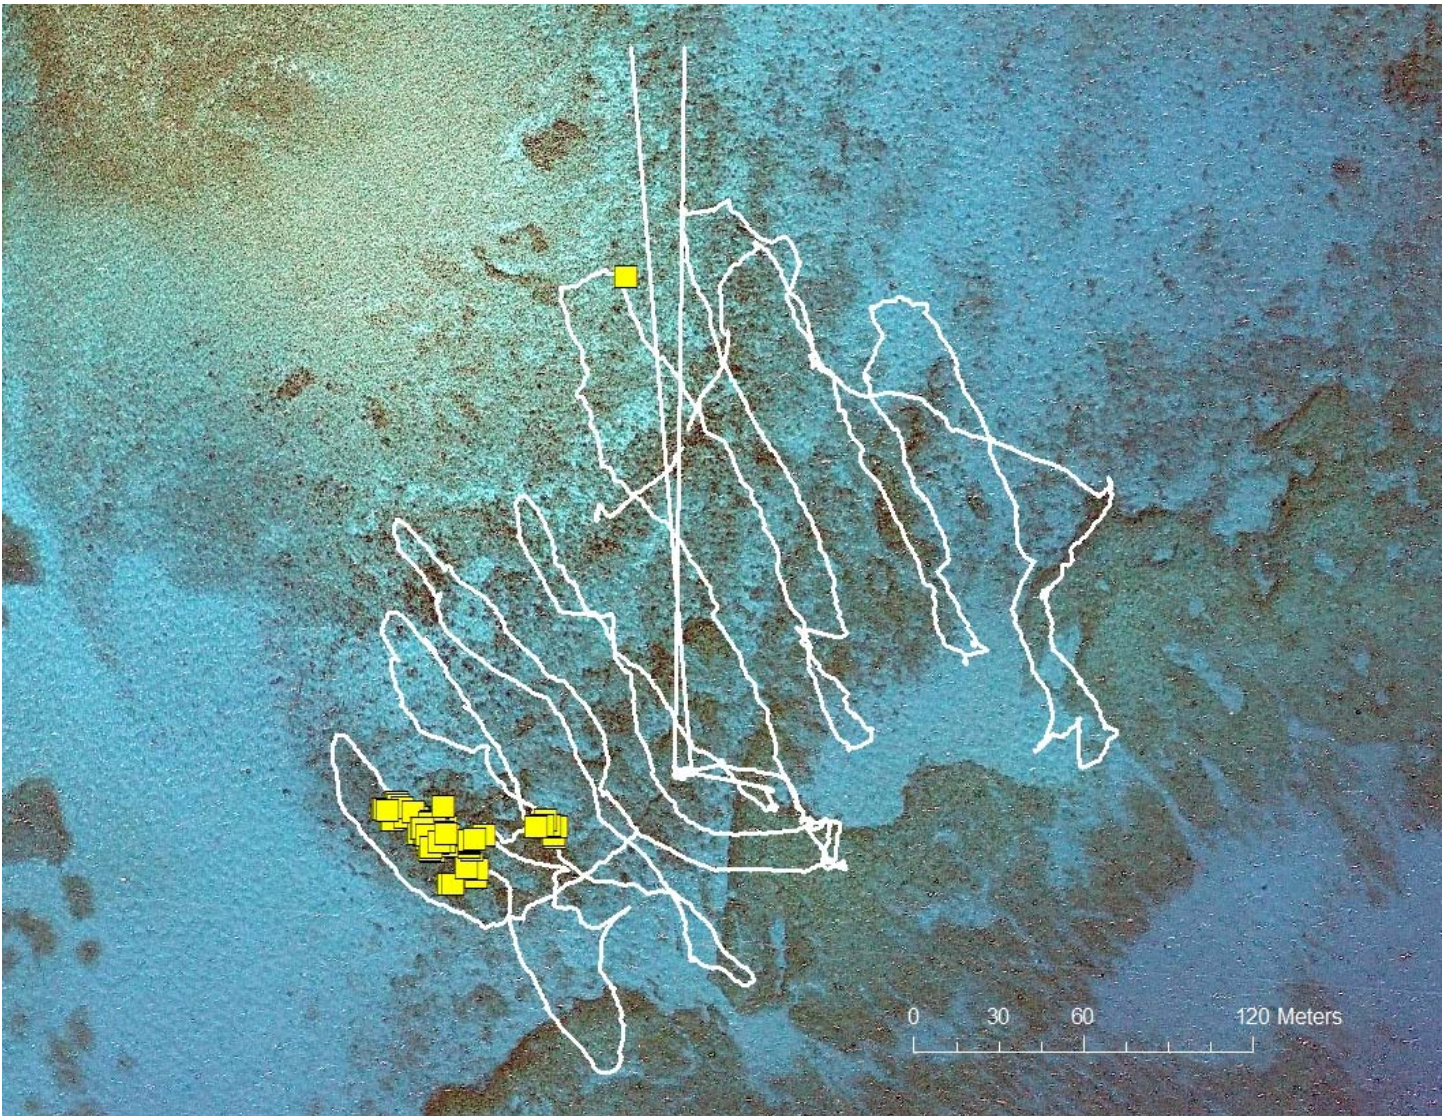

Sand Island 2014

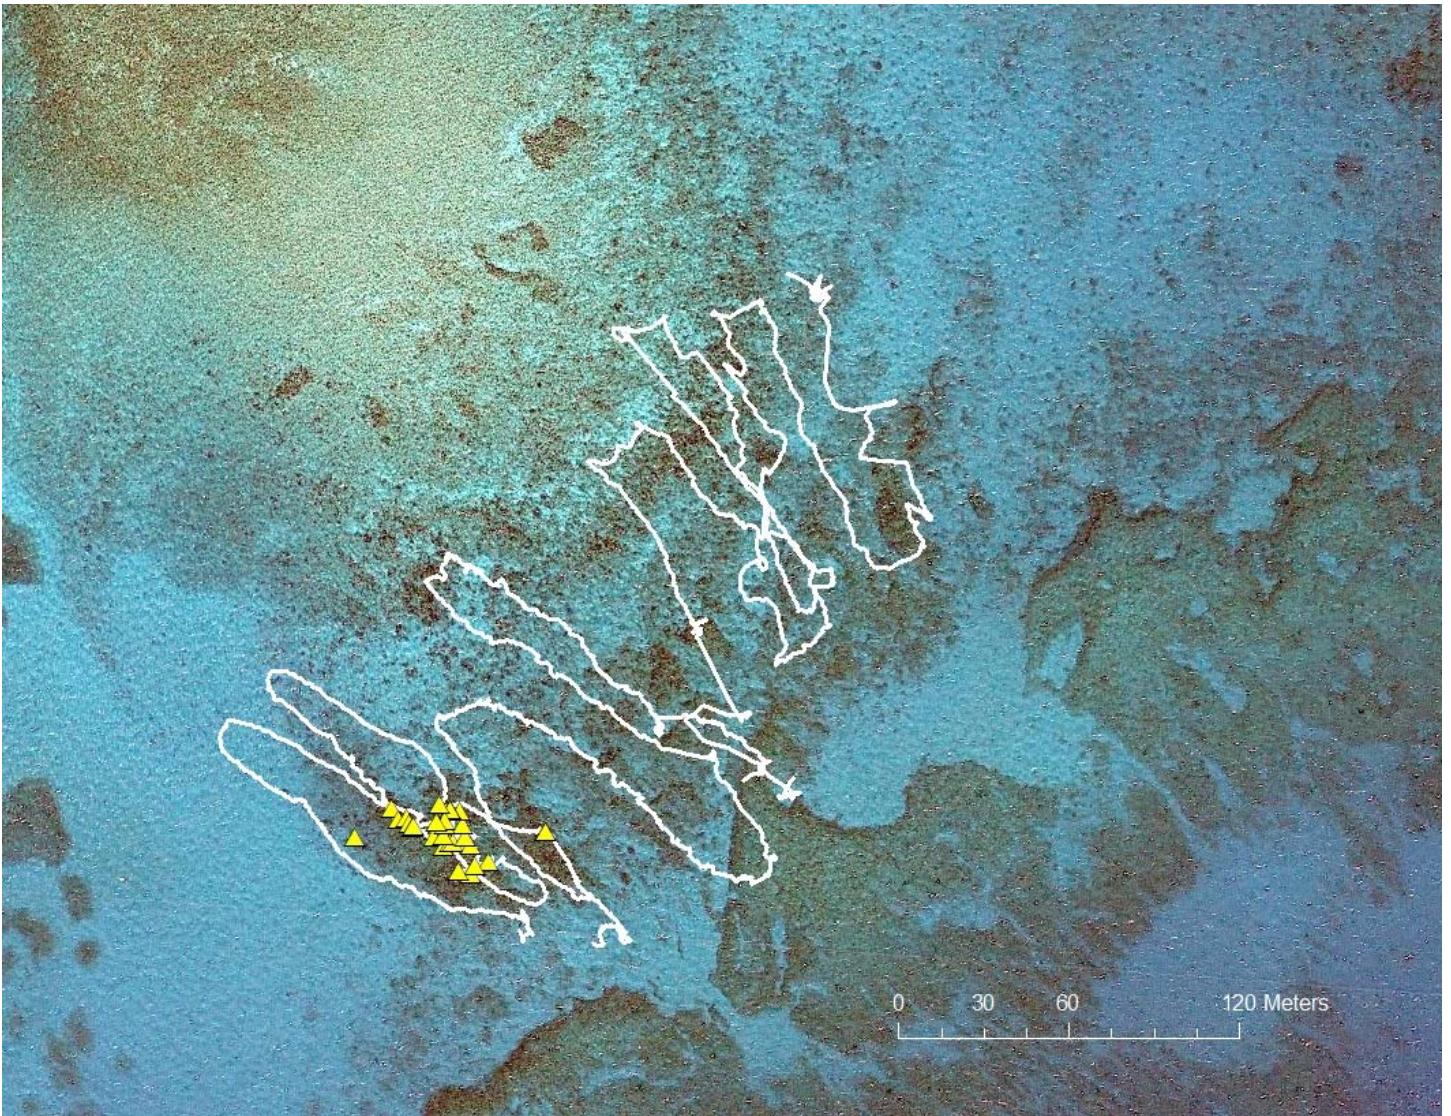

Sand Island 2015

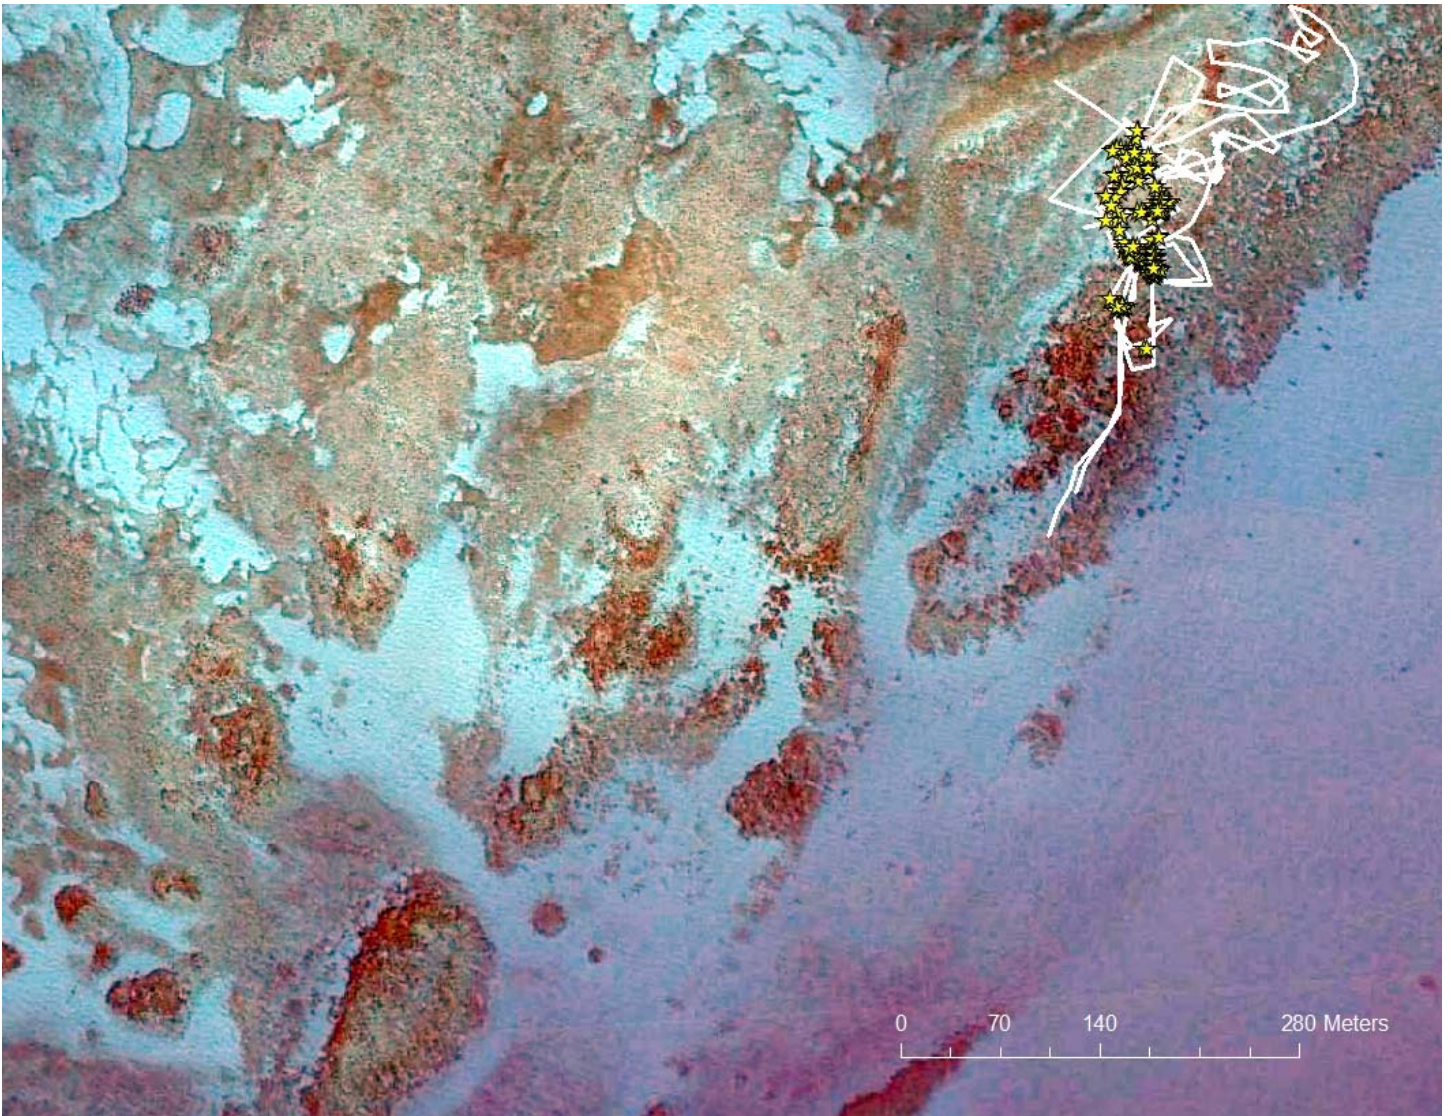

Watsons Reef 2006

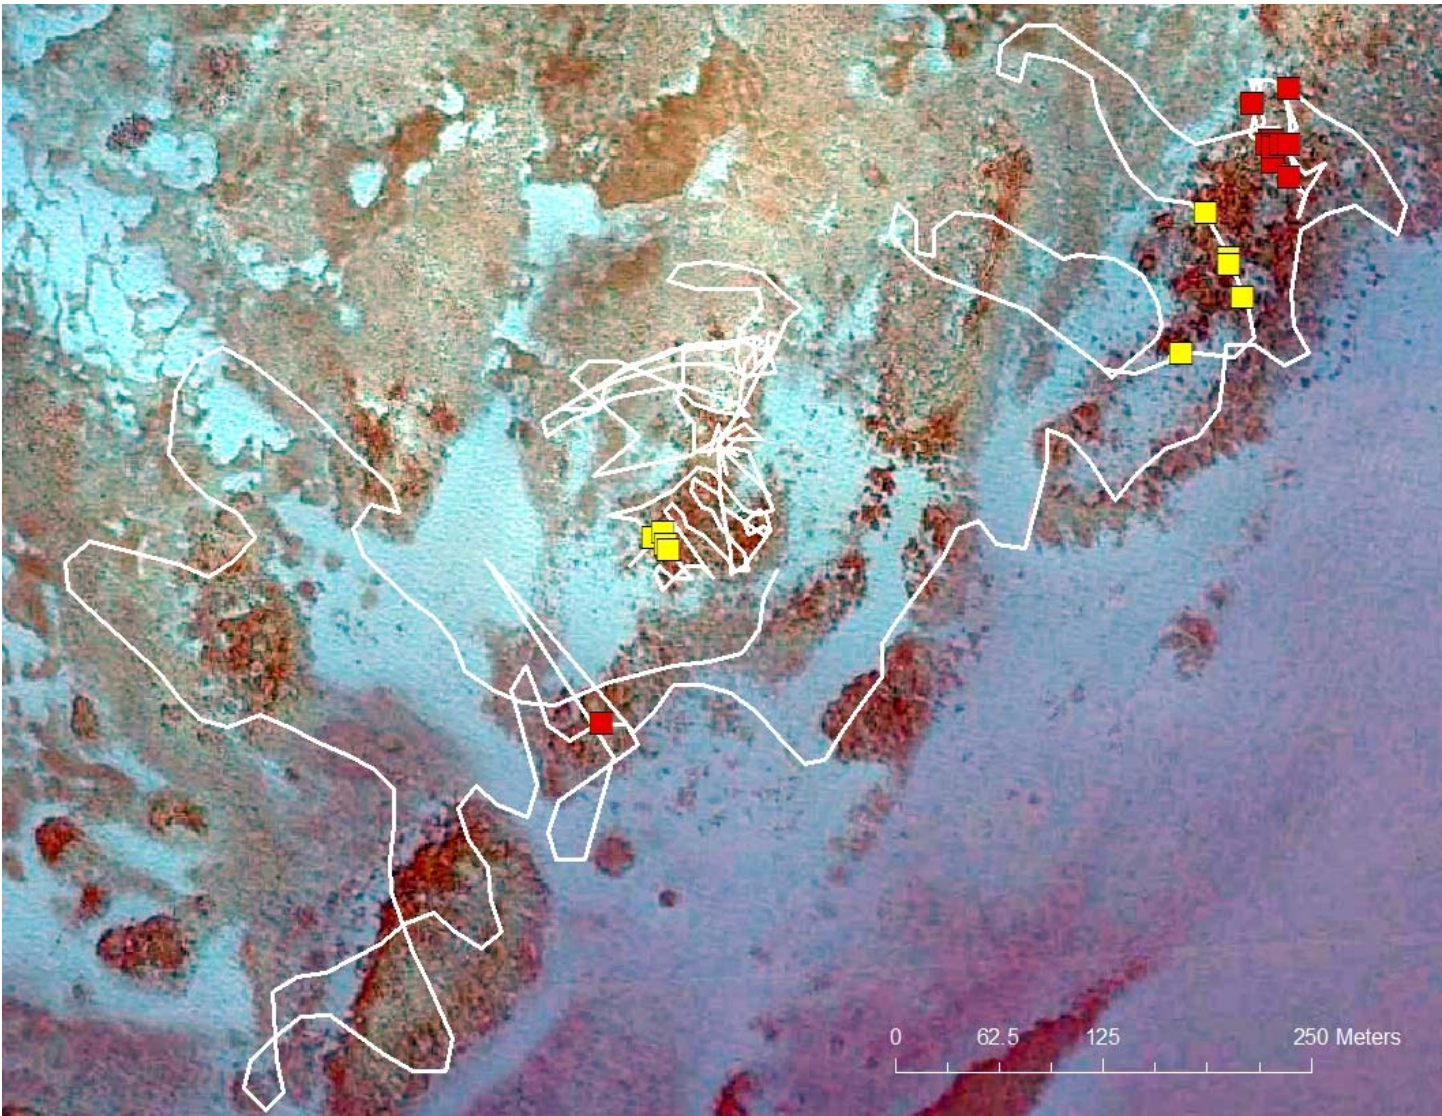

Watsons Reef 2007

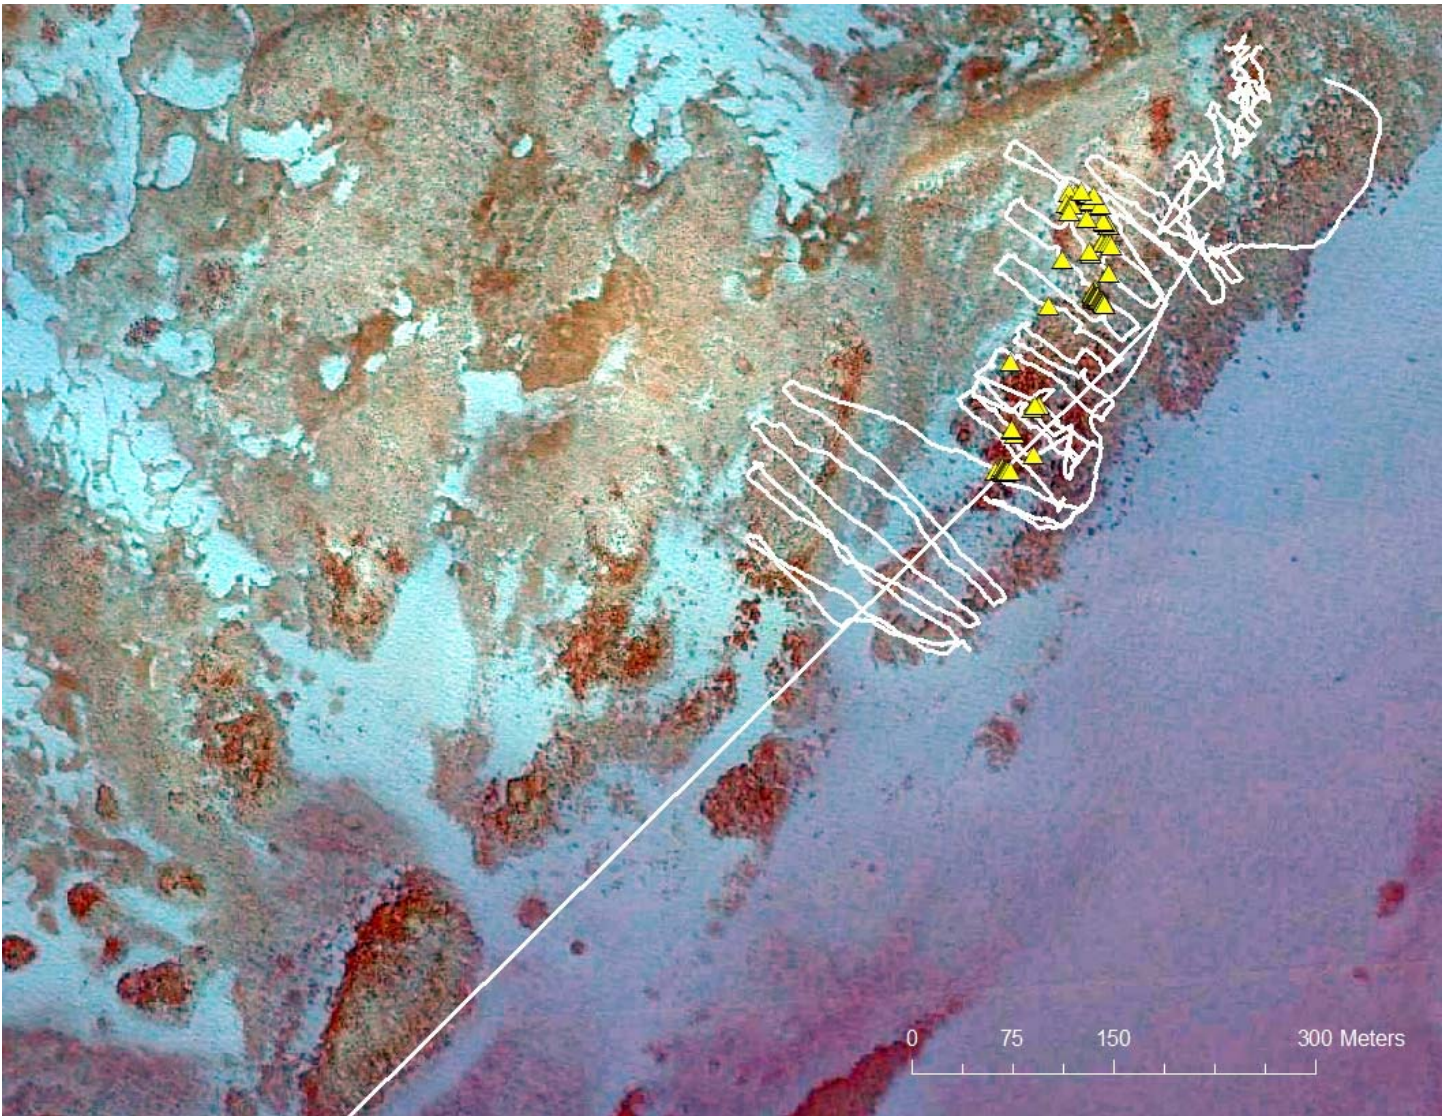

Watsons Reef 2015



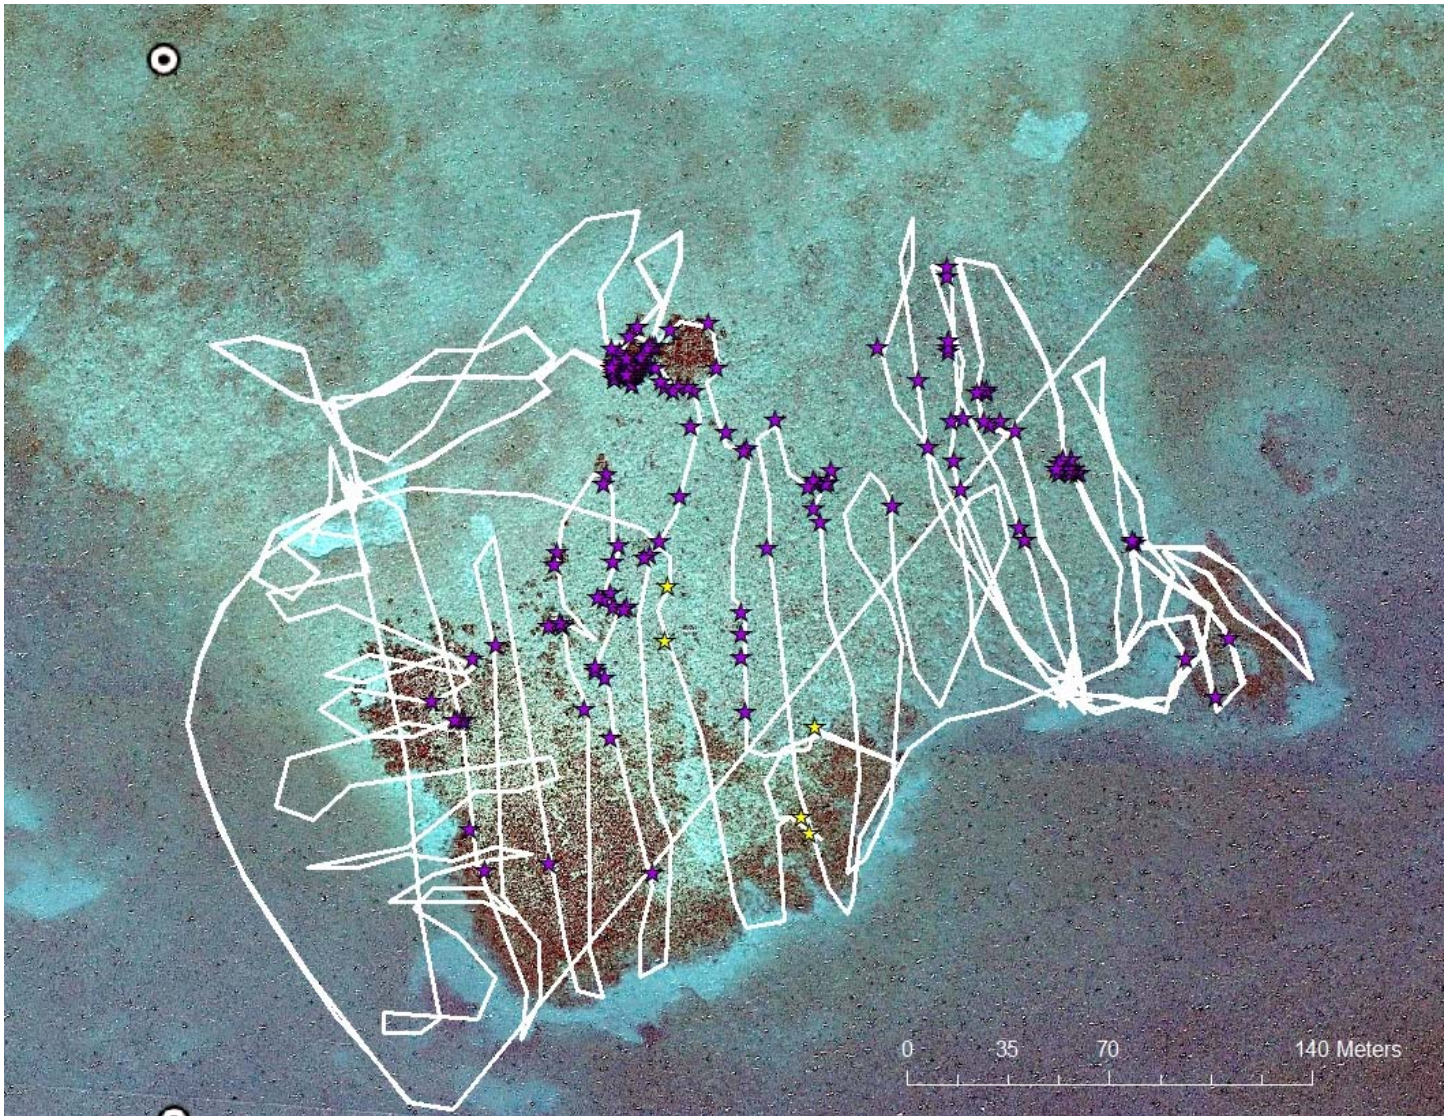

White Bank Dry Rocks #1 2006

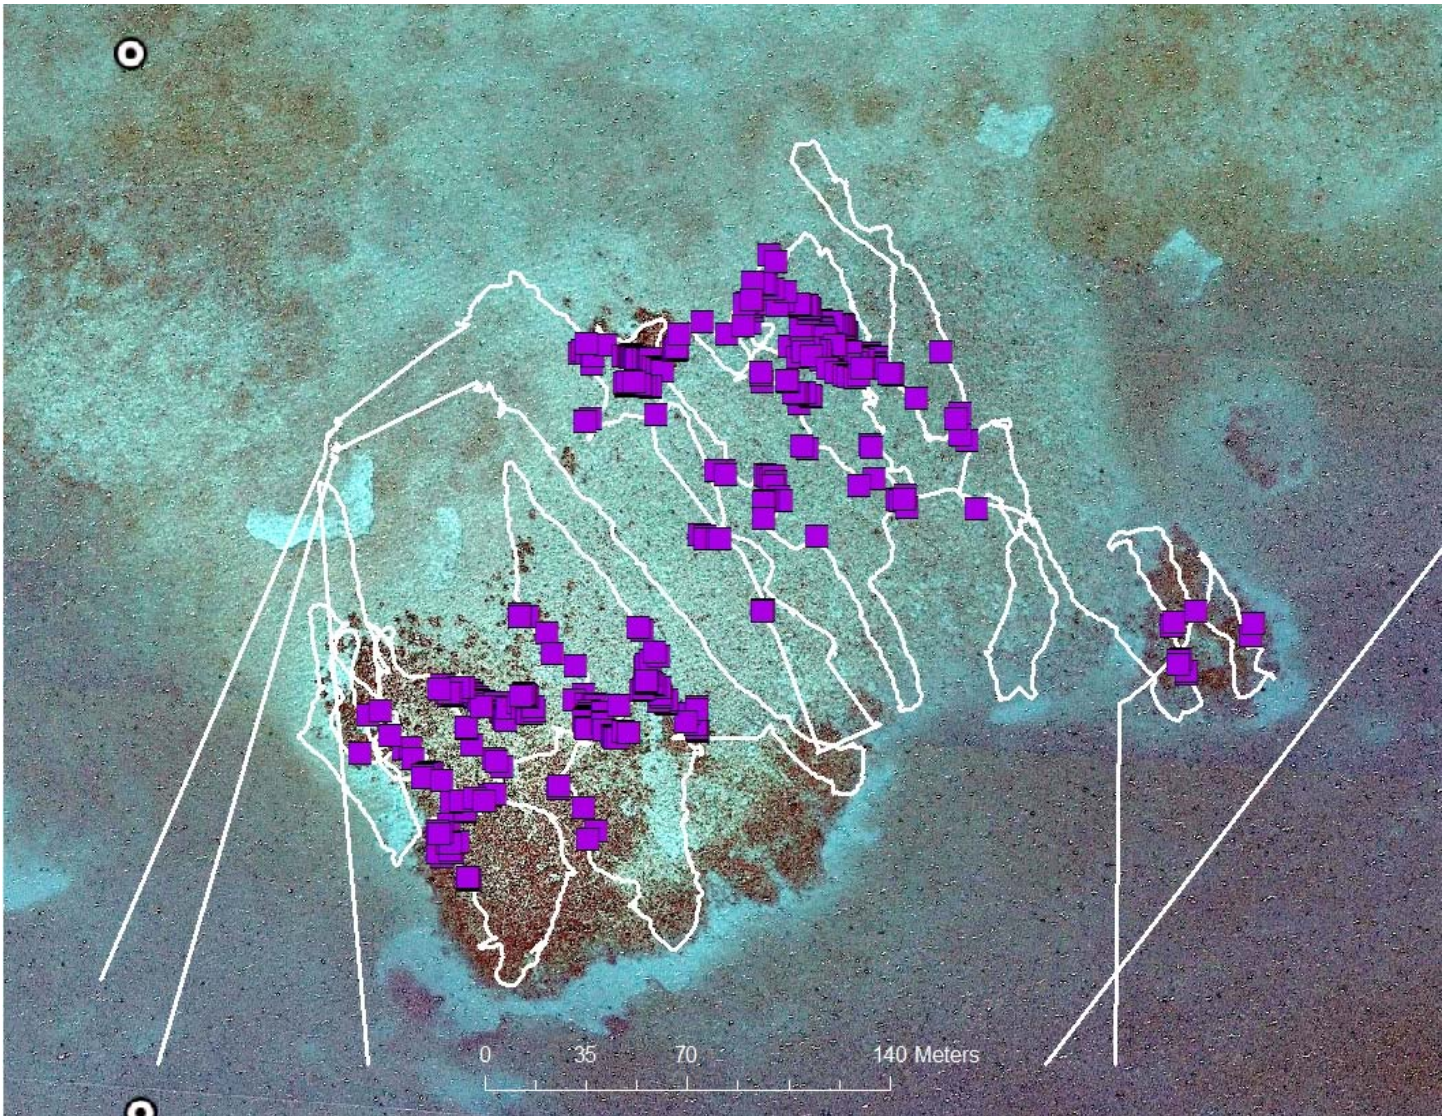

White Bank Dry Rocks #1 2014

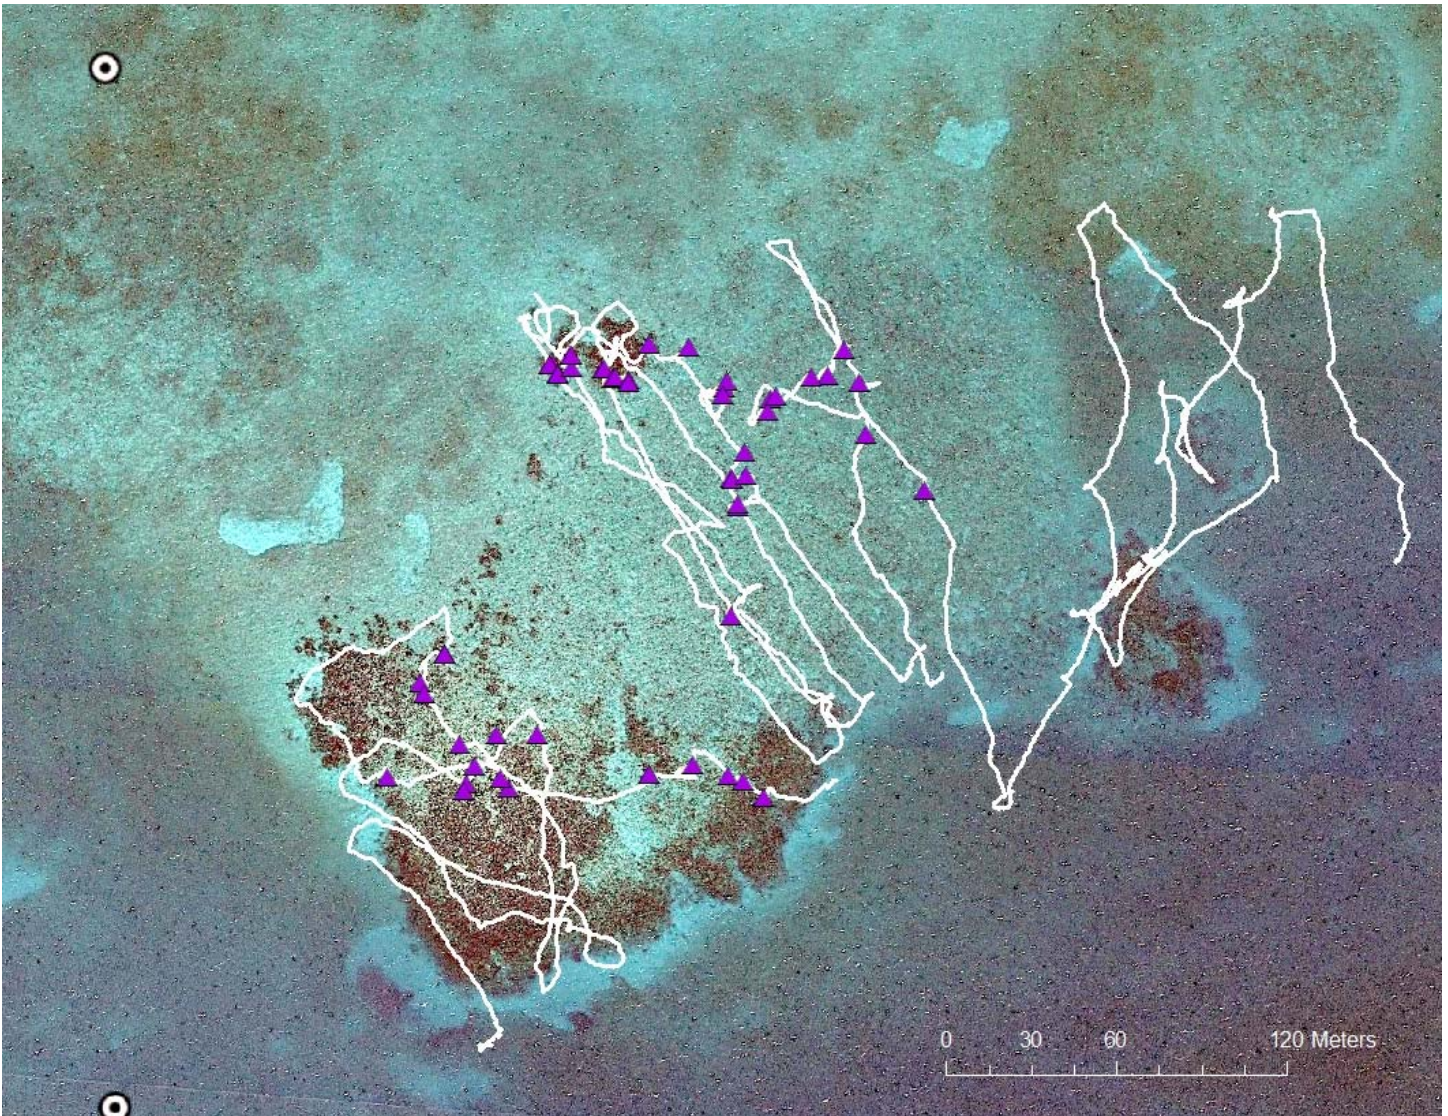

White Bank Dry Rocks #1 2015

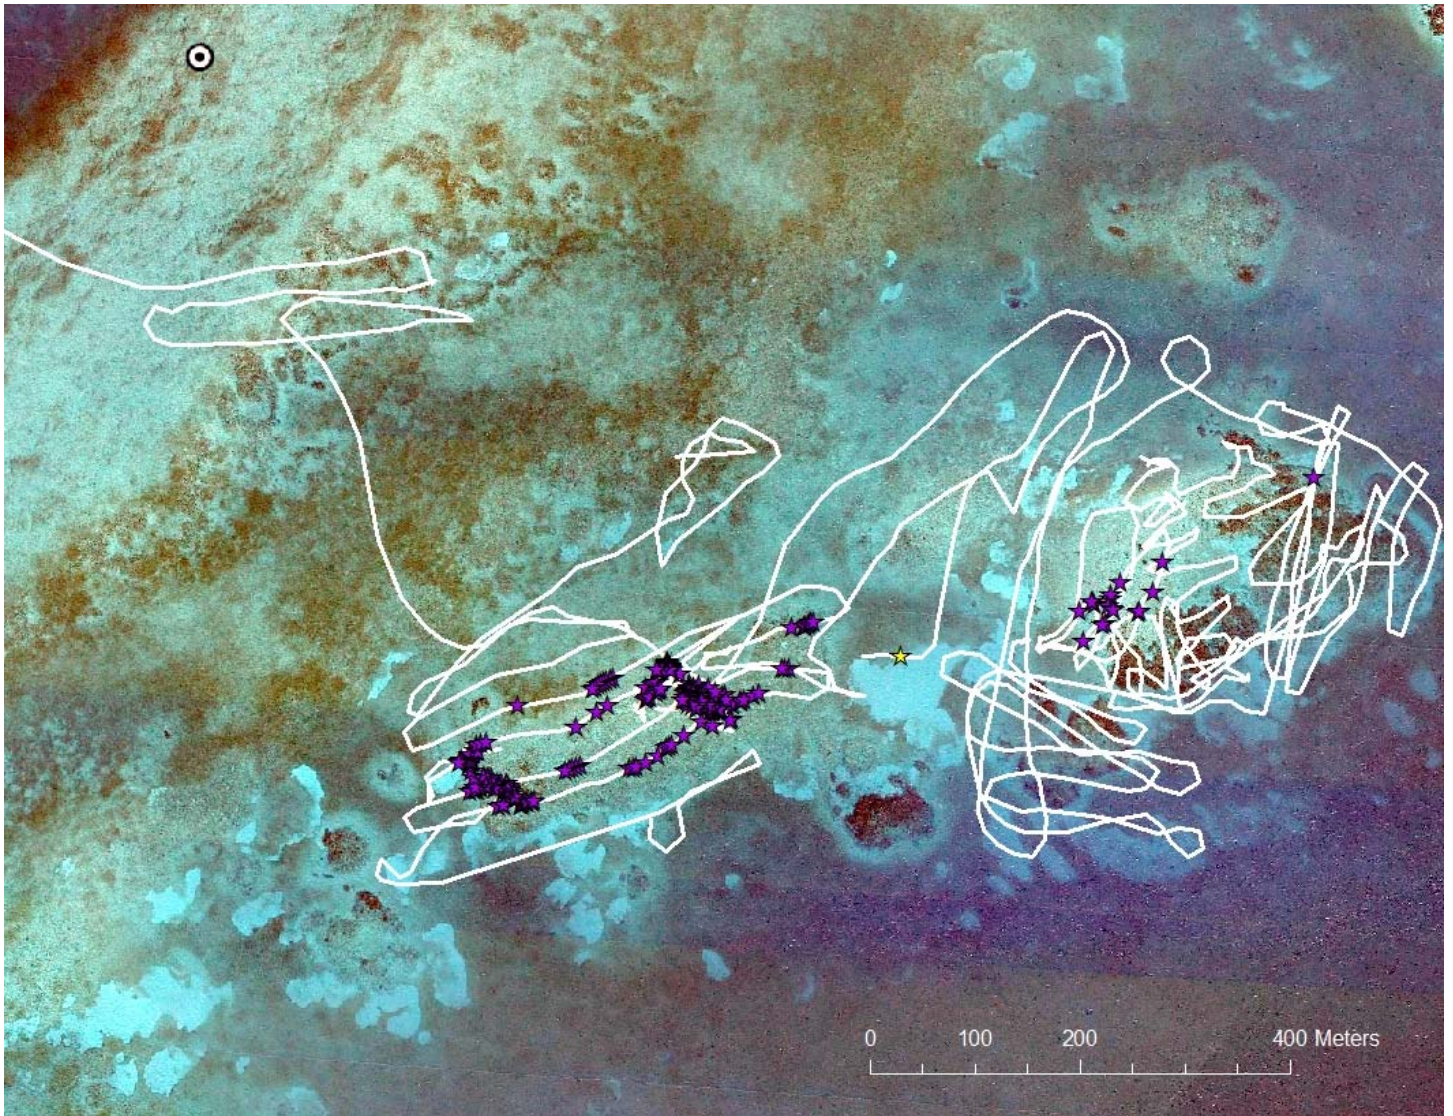

White Bank Dry Rocks #2 2006

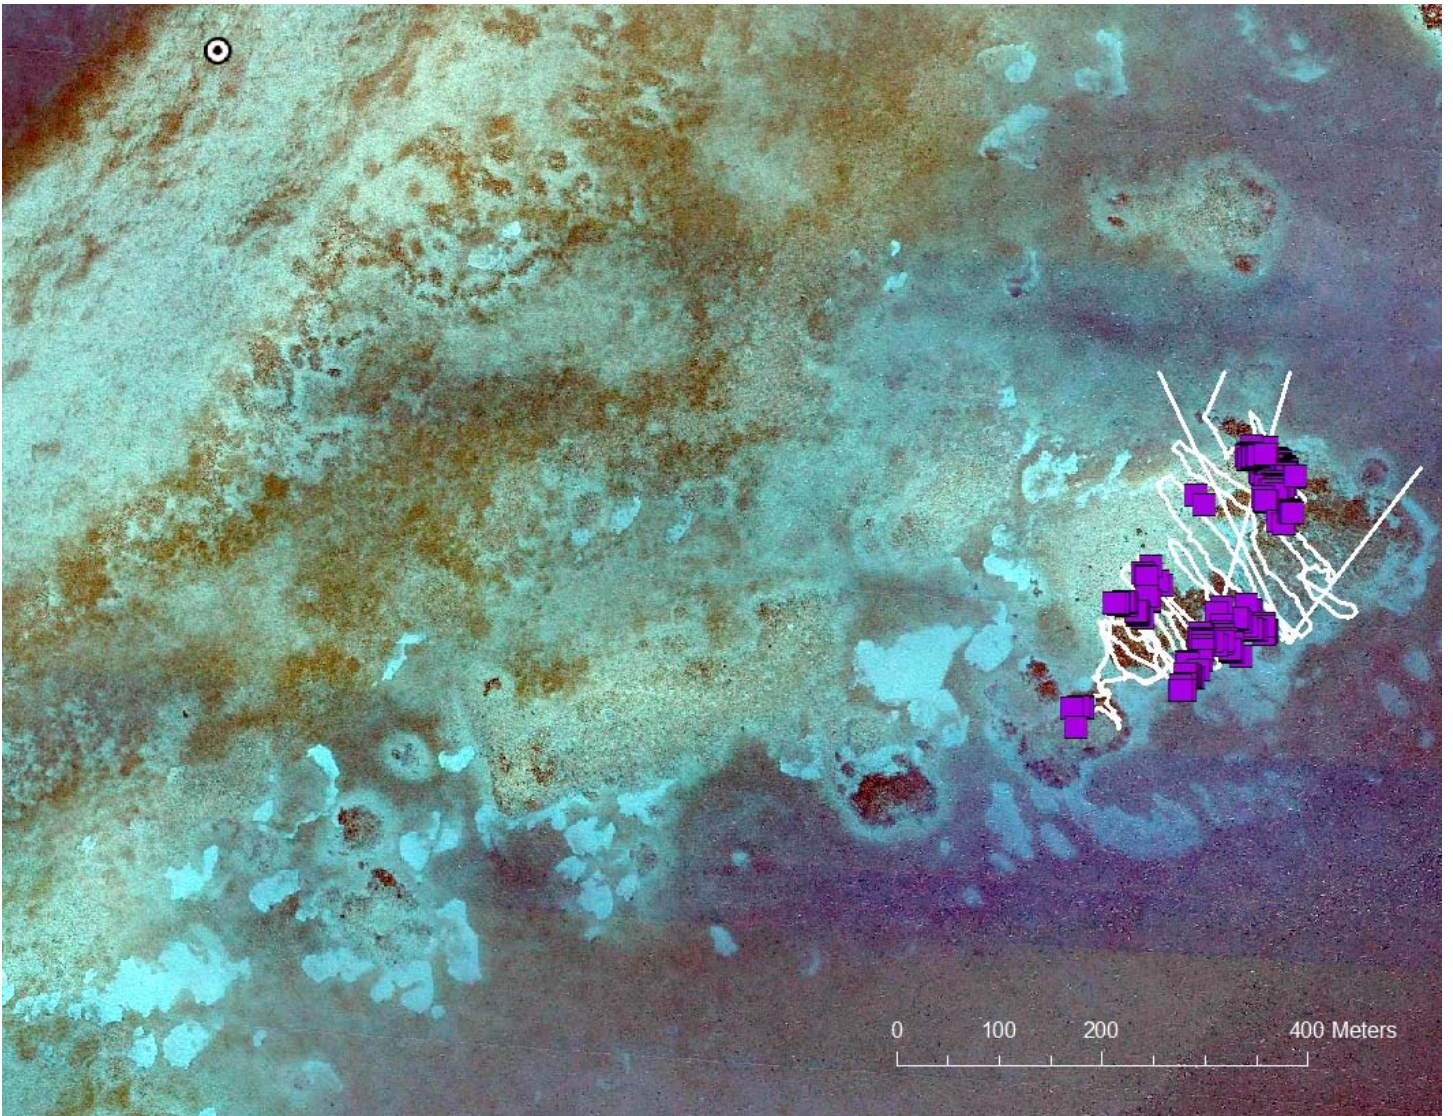

White Bank Dry Rocks #2 2014

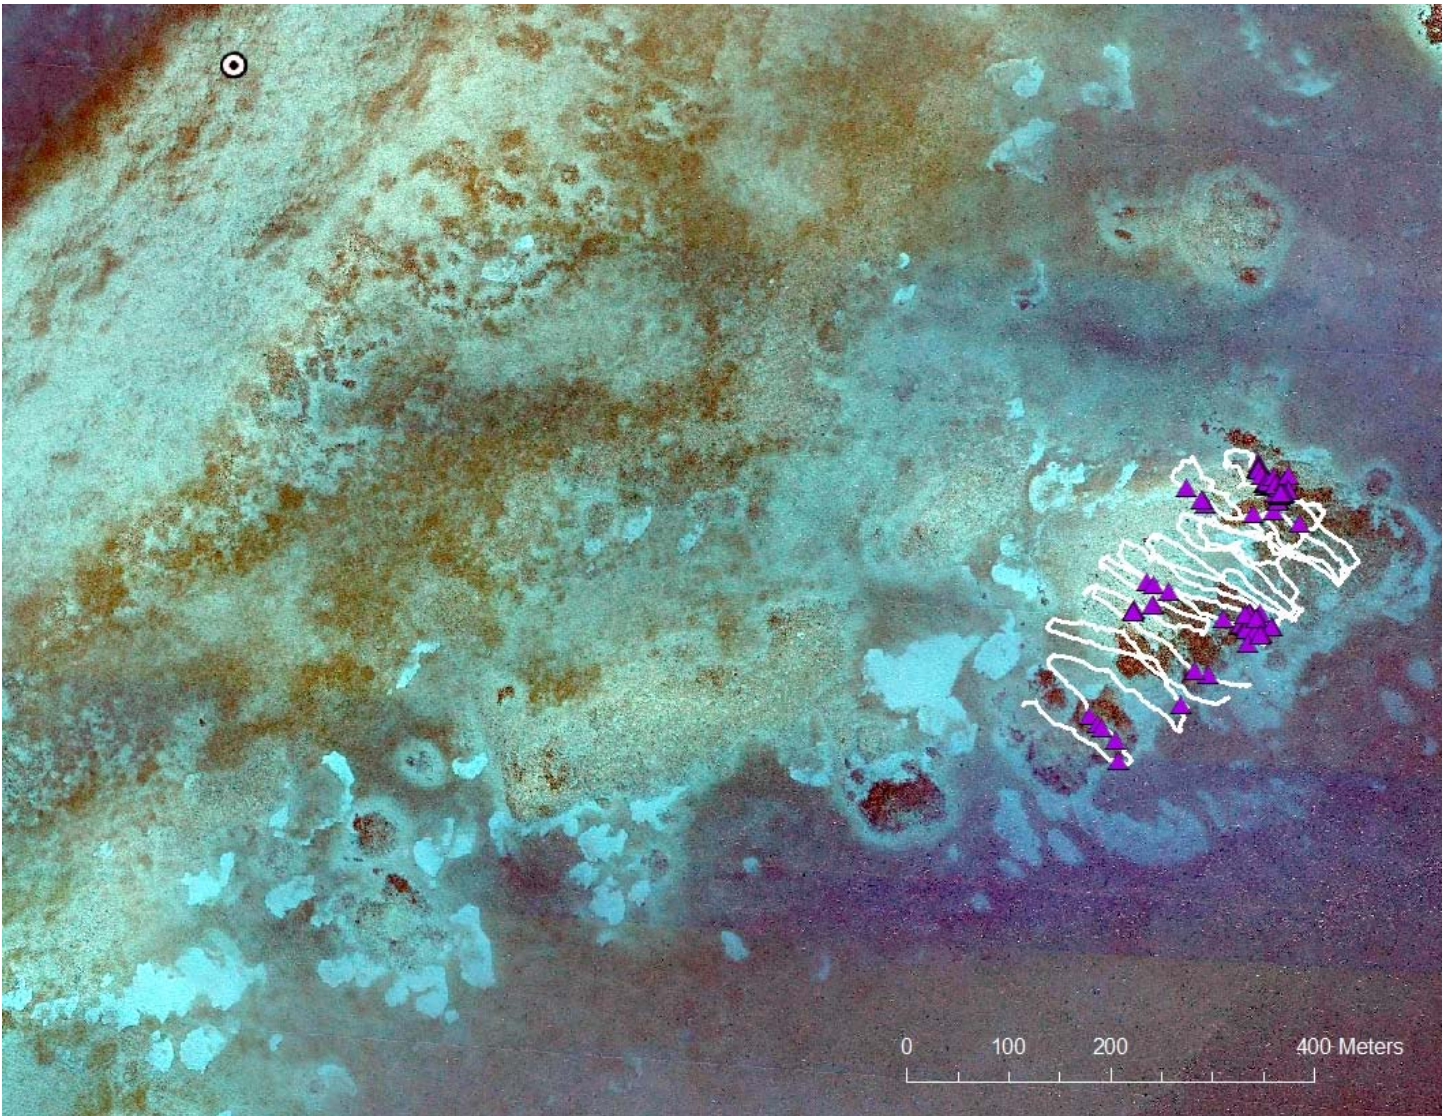

White Bank Dry Rocks #2 2015
